# Supplementary material
Source: PubMed Central journal article supplement (PMC10775954)

## Supporting Information

### **Development of Potent and Selective Coactivator-associated Arginine Methyltransferase 1 (CARM1) Degraders**

Haibo Xie,<sup>1‡</sup> Megan S Bacabac,<sup>2‡</sup> Min Ma,<sup>1</sup> Eui-Jun Kim,<sup>2</sup> Yidan Wang,<sup>2</sup> Wenxin Wu,<sup>3</sup> Lingjun Li,<sup>1,3</sup> Wei Xu<sup>2\*</sup> and Weiping Tang<sup>1,3\*</sup>

<sup>1</sup> Lachman Institute for Pharmaceutical Development, School of Pharmacy, University of Wisconsin-Madison, Madison, Wisconsin 53705, United States

<sup>2</sup> McArdle Laboratory for Cancer Research, University of Wisconsin-Madison, Madison, Wisconsin 53705, United States

<sup>3</sup> Department of Chemistry, University of Wisconsin-Madison, Madison, Wisconsin 53706, United States

<sup>‡</sup> These authors contributed equally.

## Table of Contents

|                                                                                          |     |
|------------------------------------------------------------------------------------------|-----|
| Rapid-TAC VHL based PROTACs induced degradation of CARM1 in MCF7 cells (Figure S1) ..... | S3  |
| CARM1 degradation activity in MCF10A cells (Figure S2).....                              | S3  |
| Compound <b>3b</b> cell proliferation assay in MCF7 and MCF10A cells (Figure S3).....    | S4  |
| HPLC traces.....                                                                         | S5  |
| <sup>1</sup> H and <sup>13</sup> C NMR spectrum .....                                    | S16 |

Rapid-TAC VHL based PROTACs induced degradation of CARM1 in MCF7 cells.

A

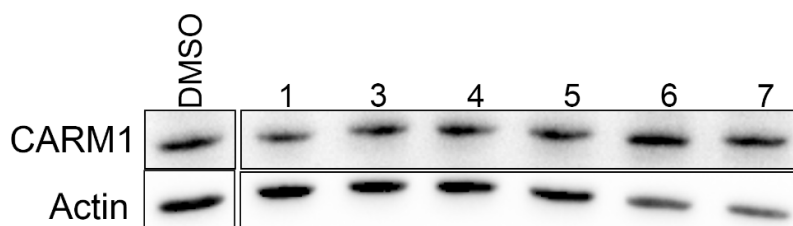

B

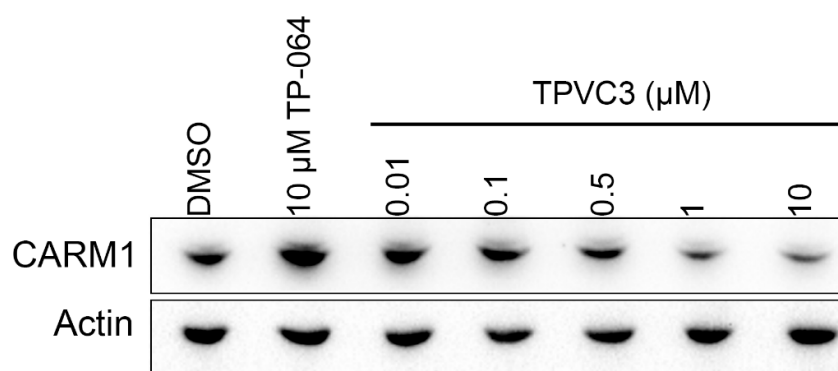

Figure S1

CARM1 degradation activity in MCF10A cells

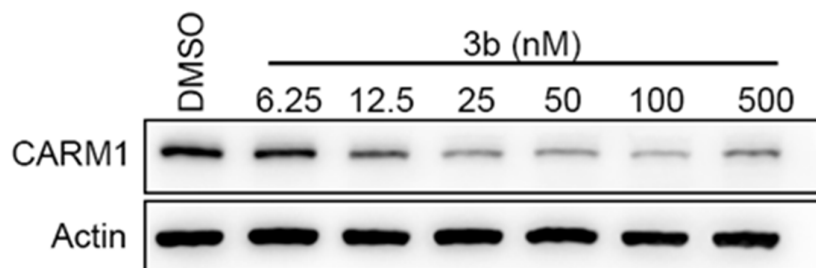

Figure S2

# Compound 3b cell proliferation assay in MCF7 and MCF10A cells

## A (MCF7 cells)

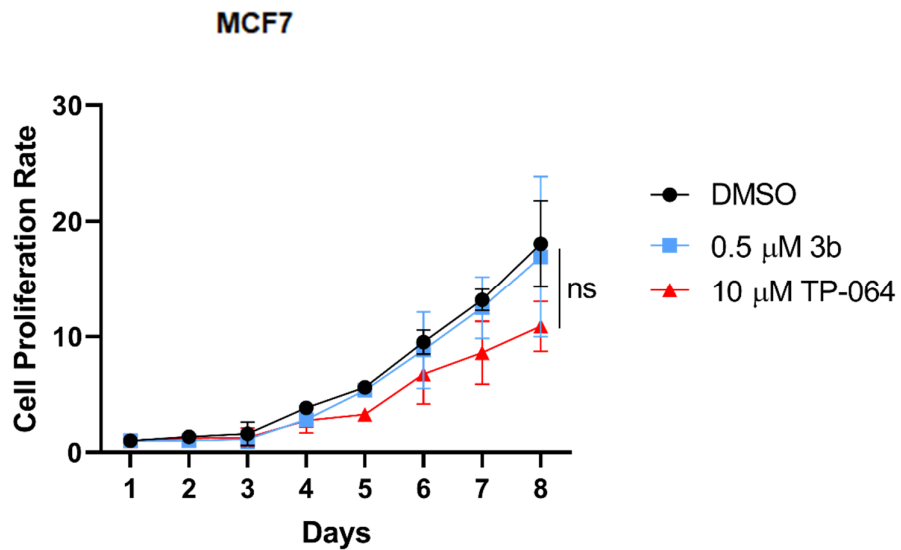

## B (MCF10A cells)

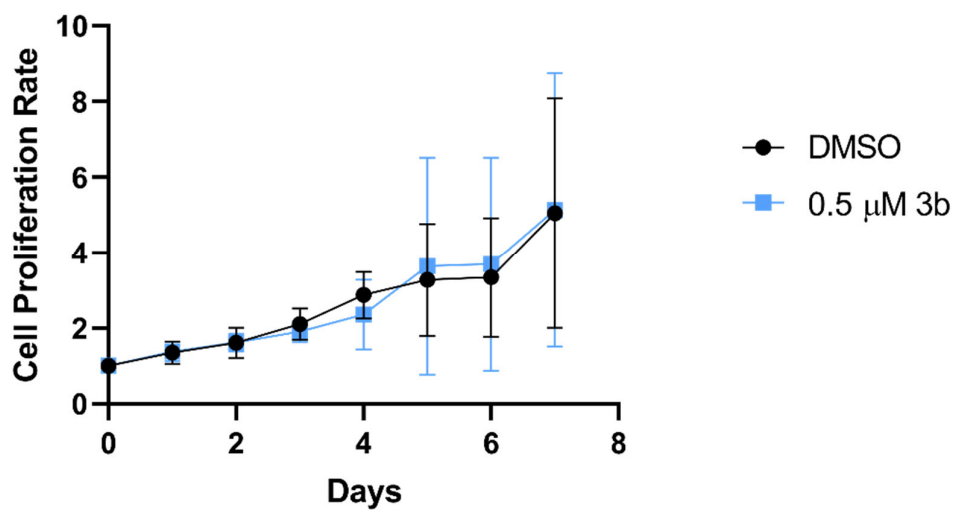

Figure S3

HPLC traces of compounds 2a-2e, 3a-3e and 3bN.

Data File D:\HPCHEM\1\DATA\HX\HX422220.D

Sample Name: HX4222

2a

```

=====
Injection Date : 5/11/23 2:12:40 PM      Seq. Line : 1
Sample Name    : HX4222                  Vial : 81
Acq. Operator  : HX                      Inj : 1
                                           Inj Volume : 10 µl
                                           Actual Inj Volume : 30 µl
Different Inj Volume from Sequence !
Method         : D:\HPCHEM\1\METHODS\G GRADRP.M
Last changed   : 5/5/23 3:21:03 PM by HX
GGG Gradient
    
```

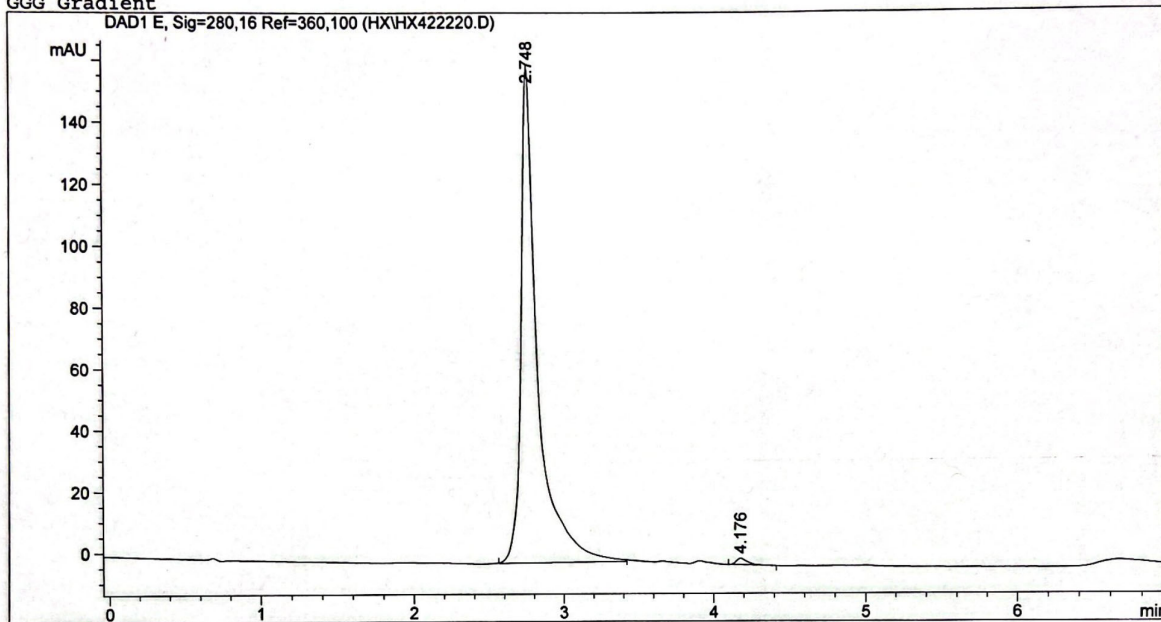

Area Percent Report

```

Sorted By      : Signal
Multiplier     : 1.0000
Dilution       : 1.0000
    
```

Signal 1: DAD1 E, Sig=280,16 Ref=360,100

| Peak # | RetTime [min] | Type | Width [min] | Area [mAU*s] | Height [mAU] | Area %  |
|--------|---------------|------|-------------|--------------|--------------|---------|
| 1      | 2.748         | BB   | 0.1067      | 1258.18115   | 161.83586    | 99.1450 |
| 2      | 4.176         | VP   | 0.0735      | 10.85085     | 2.12618      | 0.8550  |

Totals : 1269.03200 163.96204

Results obtained with enhanced integrator!

\*\*\* End of Report \*\*\*

26

```

=====
Injection Date : 5/11/23 1:36:32 PM      Seq. Line : 4
Sample Name    : HX4223                  Vial : 85
Acq. Operator  : HX                      Inj : 1
                                           Inj Volume : 10 µl

Method         : D:\HPCHEM\1\METHODS\G GRADRP.M
Last changed   : 5/5/23 3:21:03 PM by HX
GGG Gradient

```

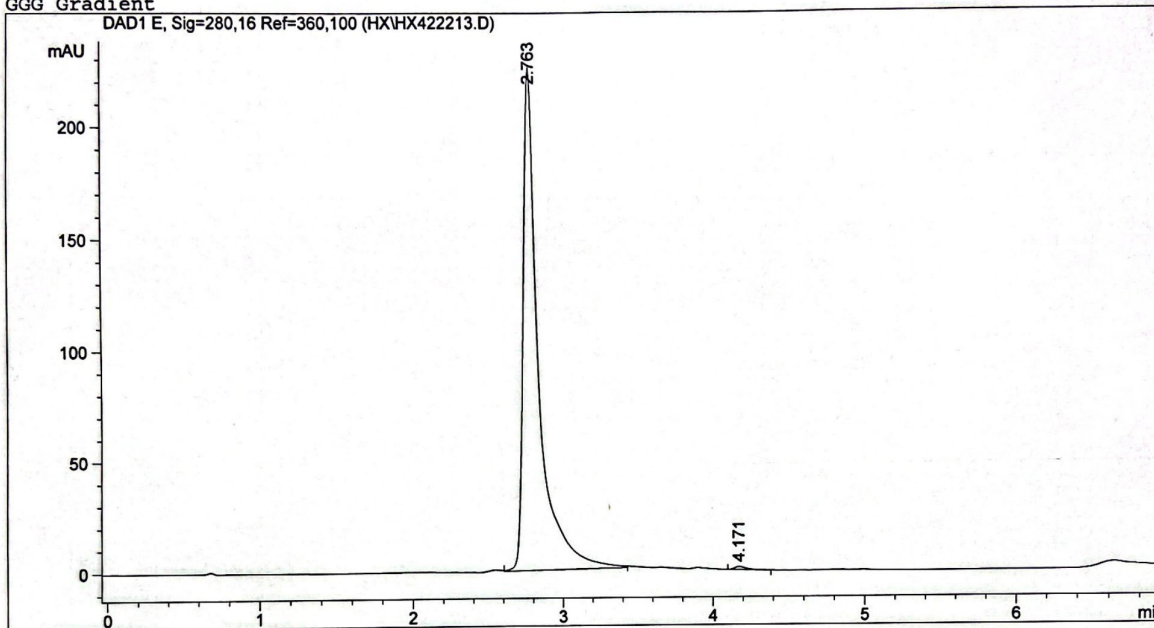

```

=====
                          Area Percent Report
=====

```

```

Sorted By      :      Signal
Multiplier     :      1.0000
Dilution       :      1.0000

```

Signal 1: DAD1 E, Sig=280,16 Ref=360,100

| Peak # | RetTime [min] | Type | Width [min] | Area [mAU*s] | Height [mAU] | Area %  |
|--------|---------------|------|-------------|--------------|--------------|---------|
| 1      | 2.763         | VB   | 0.0993      | 1620.08325   | 226.95903    | 99.5673 |
| 2      | 4.171         | VP   | 0.0765      | 7.04082      | 1.35826      | 0.4327  |

```
Totals :                      1627.12408  228.31729
```

Results obtained with enhanced integrator!

```

=====
*** End of Report ***

```

```

=====
Injection Date : 5/11/23 2:21:16 PM      Seq. Line : 2
Sample Name    : HX4224                   Vial      : 82
Acq. Operator  : HX                      Inj       : 1
                                           Inj Volume: 10 µl
                                           Actual Inj Volume: 30 µl
Different Inj Volume from Sequence !
Method         : D:\HPCHEM\1\METHODS\G GRADRP.M
Last changed   : 5/5/23 3:21:03 PM by HX
GGG Gradient

```

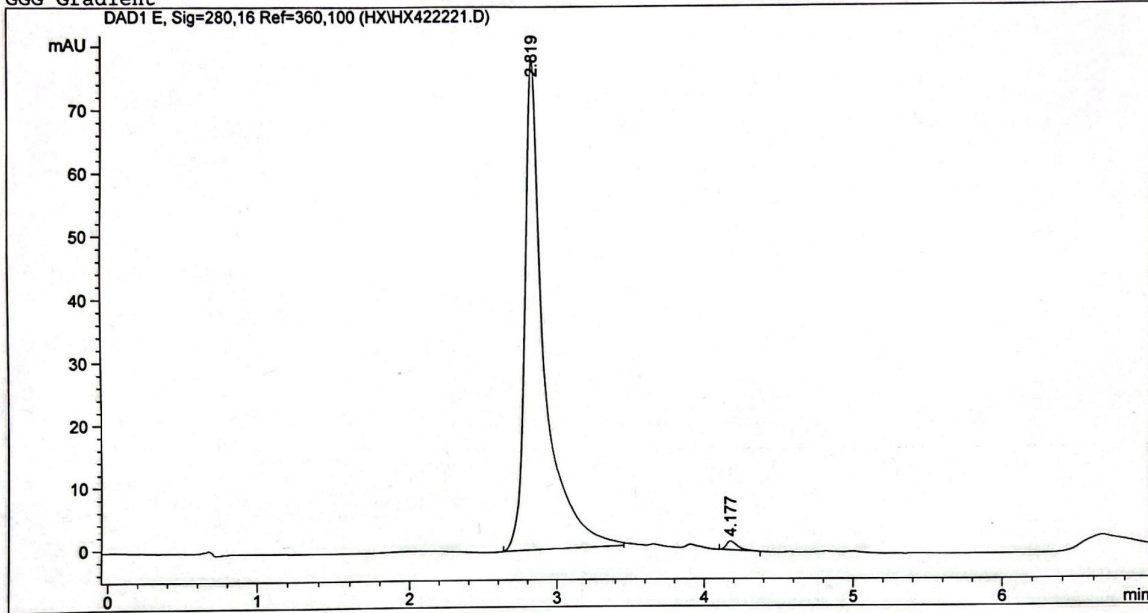

```

=====
                          Area Percent Report
=====

```

```

Sorted By      :      Signal
Multiplier     :      1.0000
Dilution       :      1.0000

```

Signal 1: DAD1 E, Sig=280,16 Ref=360,100

| Peak # | RetTime [min] | Type | Width [min] | Area [mAU*s] | Height [mAU] | Area %  |
|--------|---------------|------|-------------|--------------|--------------|---------|
| 1      | 2.819         | BB   | 0.1246      | 717.02368    | 78.45081     | 98.9833 |
| 2      | 4.177         | VP   | 0.0766      | 7.36514      | 1.41824      | 1.0167  |

```
Totals :                      724.38882  79.86904
```

Results obtained with enhanced integrator!

```

=====
*** End of Report ***

```

2d

```

=====
Injection Date : 5/10/23 8:15:45 PM      Seq. Line : 4
Sample Name    : HX4255                  Vial : 82
Acq. Operator  : HX                      Inj : 1
                                           Inj Volume : 10 µl
                                           Actual Inj Volume : 6 µl
Different Inj Volume from Sequence !
Method         : D:\HPCHEM\1\METHODS\G GRADRP.M
Last changed   : 5/5/23 3:21:03 PM by HX
GGG Gradient
=====

```

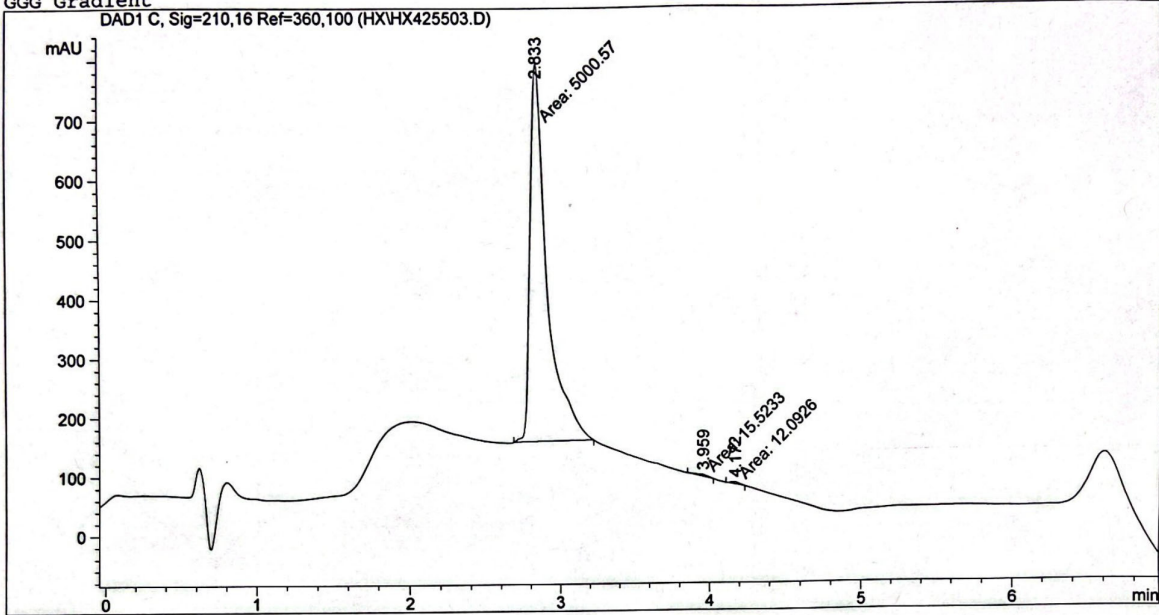

```

=====
                          Area Percent Report
=====

```

```

Sorted By      :      Signal
Multiplier     :      1.0000
Dilution       :      1.0000

```

Signal 1: DAD1 C, Sig=210,16 Ref=360,100

| Peak # | RetTime [min] | Type | Width [min] | Area [mAU*s] | Height [mAU] | Area %  |
|--------|---------------|------|-------------|--------------|--------------|---------|
| 1      | 2.833         | MM   | 0.1299      | 5000.56738   | 641.42169    | 99.4508 |
| 2      | 3.959         | MM   | 0.0875      | 15.52326     | 2.95701      | 0.3087  |
| 3      | 4.172         | MM   | 0.0611      | 12.09259     | 3.29925      | 0.2405  |

```
Totals :                      5028.18322  647.67796
```

Results obtained with enhanced integrator!

```

=====
*** End of Report ***
=====

```



2e

```

=====
Injection Date : 5/4/23 12:14:38 PM      Seq. Line : 2
Sample Name   : HX4256-6                  Vial : 83
Acq. Operator : HX                        Inj : 1
                                           Inj Volume : 20 µl

Acq. Method   : D:\HPCHEM\1\METHODS\G GRADRP.M
Last changed  : 4/19/23 9:26:05 AM by hua
Analysis Method : D:\HPCHEM\1\METHODS\G GRADRP.M
Last changed  : 5/3/23 2:39:28 PM by Qihua
                (modified after loading)
    
```

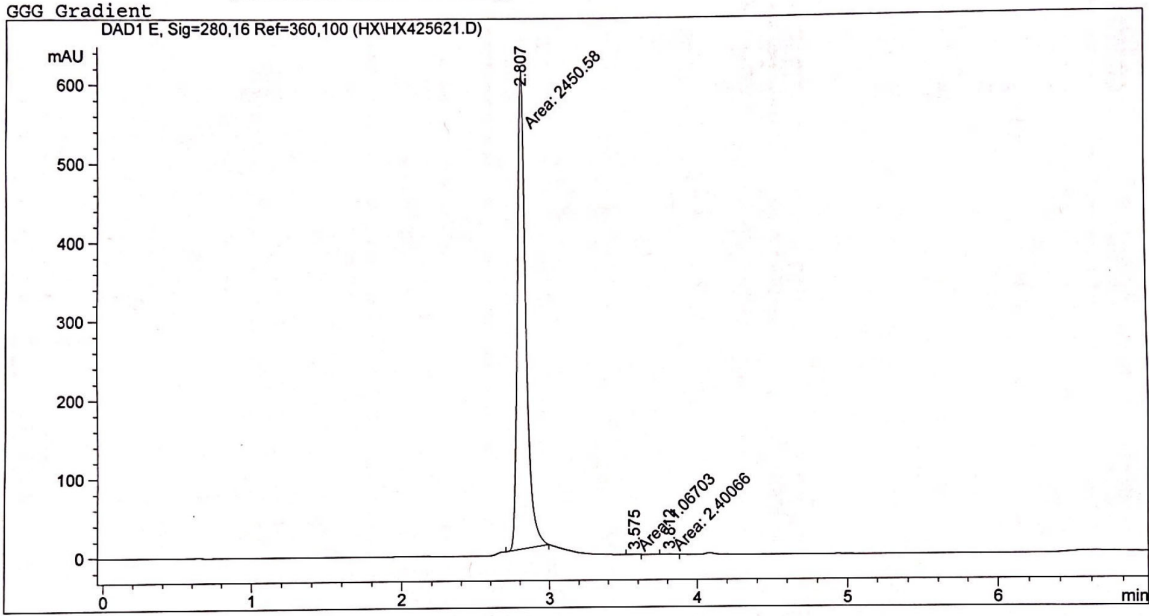

Area Percent Report

```

Sorted By      : Signal
Multiplier     : 1.0000
Dilution       : 1.0000
    
```

Signal 1: DAD1 E, Sig=280,16 Ref=360,100

| Peak # | RetTime [min] | Type | Width [min] | Area [mAU*s] | Height [mAU] | Area %  |
|--------|---------------|------|-------------|--------------|--------------|---------|
| 1      | 2.807         | MM T | 0.0666      | 2450.57764   | 613.32916    | 99.8587 |
| 2      | 3.575         | MM T | 0.0511      | 1.06703      | 3.48046e-1   | 0.0435  |
| 3      | 3.812         | MM T | 0.0549      | 2.40066      | 7.28527e-1   | 0.0978  |

Totals : 2454.04532 614.40574

Results obtained with enhanced integrator!

\*\*\* End of Report \*\*\*

3a

```

=====
Injection Date   : 5/13/23 12:08:58 PM      Seq. Line :    3
Sample Name     : HX5018-18                Vial      :   63
Acq. Operator   : HX                      Inj       :    1
                                           Inj Volume: 10 µl
                                           Actual Inj Volume: 40 µl
Differnt Inj Volume from Sequence !
Method          : D:\HPCHEM\1\METHODS\G GRADRP.M
Last changed    : 5/5/23 3:21:03 PM by HX
GGG Gradient
    
```

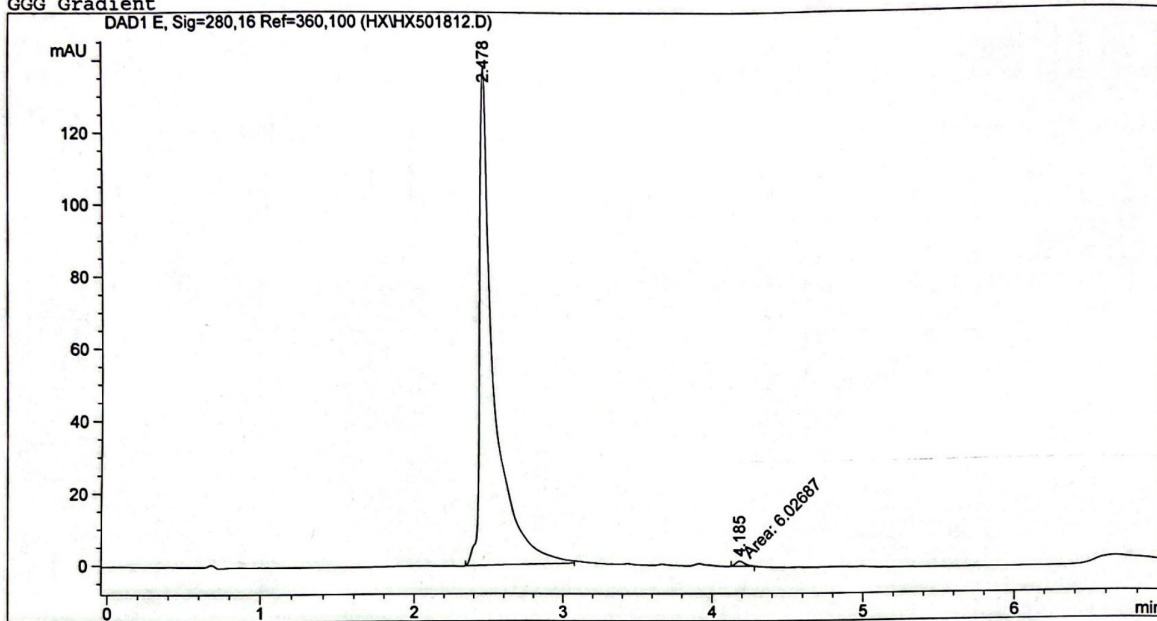

=====  
 Area Percent Report  
 =====

```

Sorted By      :      Signal
Multiplier     :      1.0000
Dilution       :      1.0000
    
```

Signal 1: DAD1 E, Sig=280,16 Ref=360,100

| Peak # | RetTime [min] | Type | Width [min] | Area [mAU*s] | Height [mAU] | Area %  |
|--------|---------------|------|-------------|--------------|--------------|---------|
| 1      | 2.478         | PB   | 0.0914      | 920.10443    | 138.75764    | 99.3492 |
| 2      | 4.185         | MM   | 0.0694      | 6.02687      | 1.44702      | 0.6508  |

Totals :                                    926.13130    140.20467

Results obtained with enhanced integrator!

=====  
 \*\*\* End of Report \*\*\*

3b

```

=====
Injection Date   : 5/17/23 10:17:50 AM      Seq. Line   :    6
Sample Name     : HX5019-11                Vial        :   62
Acq. Operator   : HX                      Inj         :    1
                                           Inj Volume  : 10 µl
                                           Actual Inj Volume : 30 µl
Different Inj Volume from Sequence !
Method          : D:\HPCHEM\1\METHODS\G GRADRP.M
Last changed    : 5/5/23 3:21:03 PM by HX
GGG Gradient
    
```

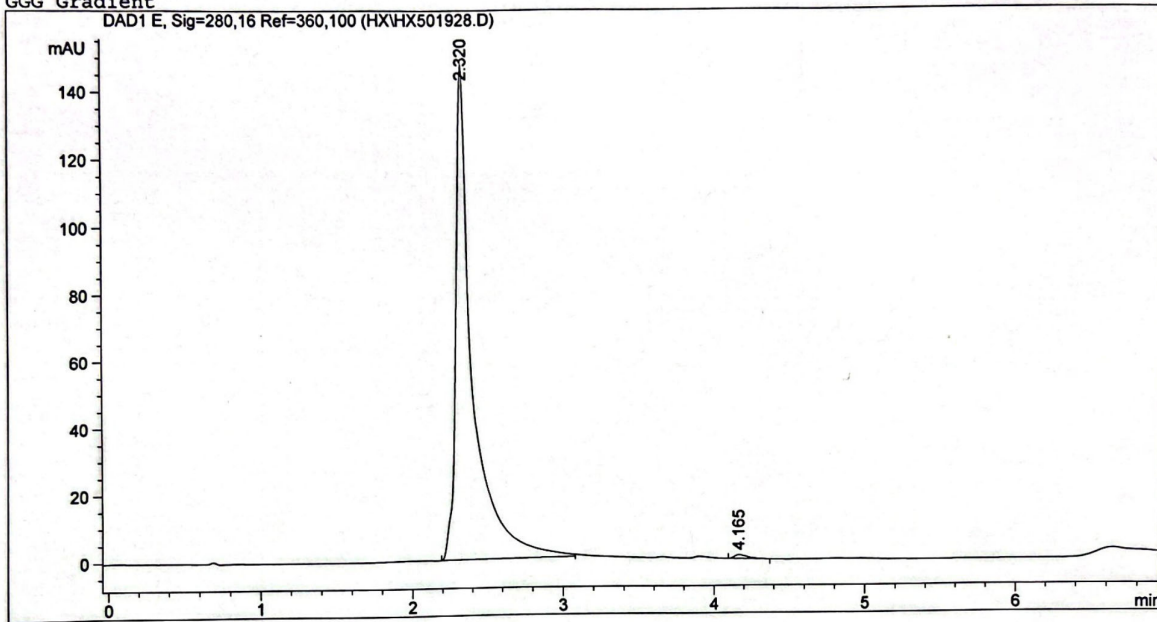

=====  
Area Percent Report  
=====

```

Sorted By      :      Signal
Multiplier     :      1.0000
Dilution       :      1.0000
    
```

Signal 1: DAD1 E, Sig=280,16 Ref=360,100

| Peak # | RetTime [min] | Type | Width [min] | Area [mAU*s] | Height [mAU] | Area %  |
|--------|---------------|------|-------------|--------------|--------------|---------|
| 1      | 2.320         | PB   | 0.1089      | 1156.88538   | 148.41745    | 99.3787 |
| 2      | 4.165         | VP   | 0.0959      | 7.23271      | 1.20791      | 0.6213  |

Totals :                                    1164.11808   149.62536

Results obtained with enhanced integrator!

=====  
\*\*\* End of Report \*\*\*



30

```

=====
Injection Date : 5/13/23 4:05:57 PM      Seq. Line : 3
Sample Name    : HX5109-38                Vial : 63
Acq. Operator  : HX                      Inj : 1
                                           Inj Volume : 10 µl
                                           Actual Inj Volume : 20 µl
Different Inj Volume from Sequence 1
Method         : D:\HPCHEM\1\METHODS\G GRADRP.M
Last changed   : 5/5/23 3:21:03 PM by HX
GGG Gradient
    
```

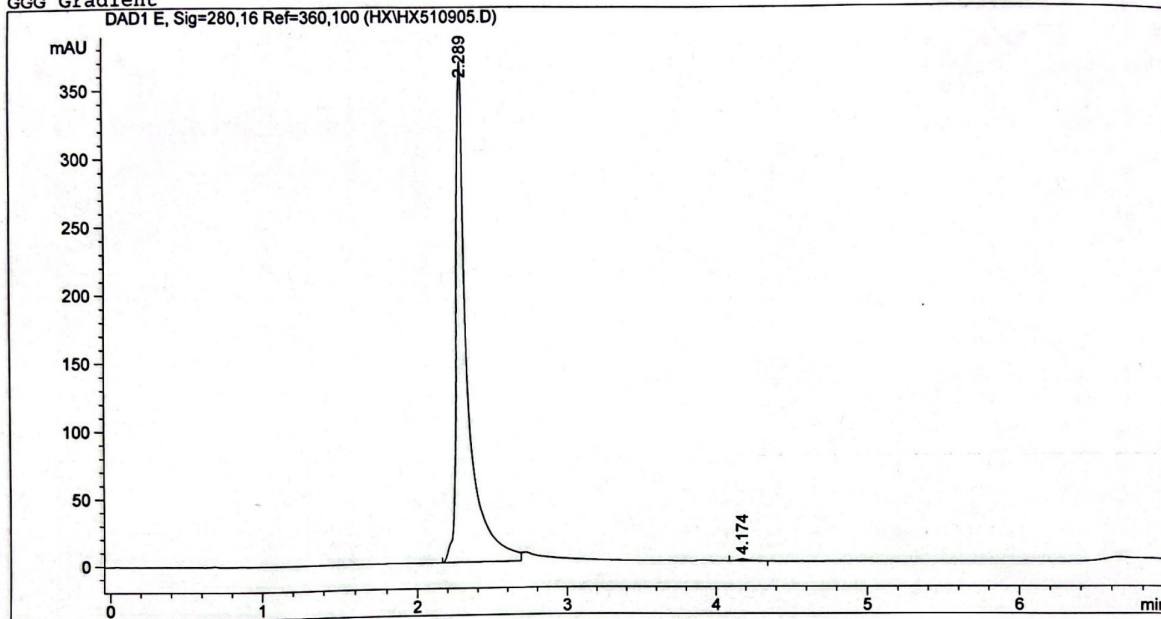

Area Percent Report

```

Sorted By      : Signal
Multiplier     : 1.0000
Dilution       : 1.0000
    
```

Signal 1: DAD1 E, Sig=280,16 Ref=360,100

| Peak # | RetTime [min] | Type | Width [min] | Area [mAU*s] | Height [mAU] | Area %  |
|--------|---------------|------|-------------|--------------|--------------|---------|
| 1      | 2.289         | PV   | 0.0752      | 1960.18494   | 373.84650    | 99.6084 |
| 2      | 4.174         | BB   | 0.0749      | 7.70619      | 1.52534      | 0.3916  |

Totals : 1967.89113 375.37184

Results obtained with enhanced integrator!

\*\*\* End of Report \*\*\*

3d

```

=====
Injection Date : 5/13/23 5:58:32 PM      Seq. Line : 3
Sample Name    : HX5110-87                Vial       : 63
Acq. Operator  : HX                      Inj        : 1
                                           Inj Volume : 10 µl
                                           Actual Inj Volume : 20 µl
Different Inj Volume from Sequence !
Method         : D:\HPCHEM\1\METHODS\G GRADRP.M
Last changed   : 5/5/23 3:21:03 PM by HX
GGG Gradient

```

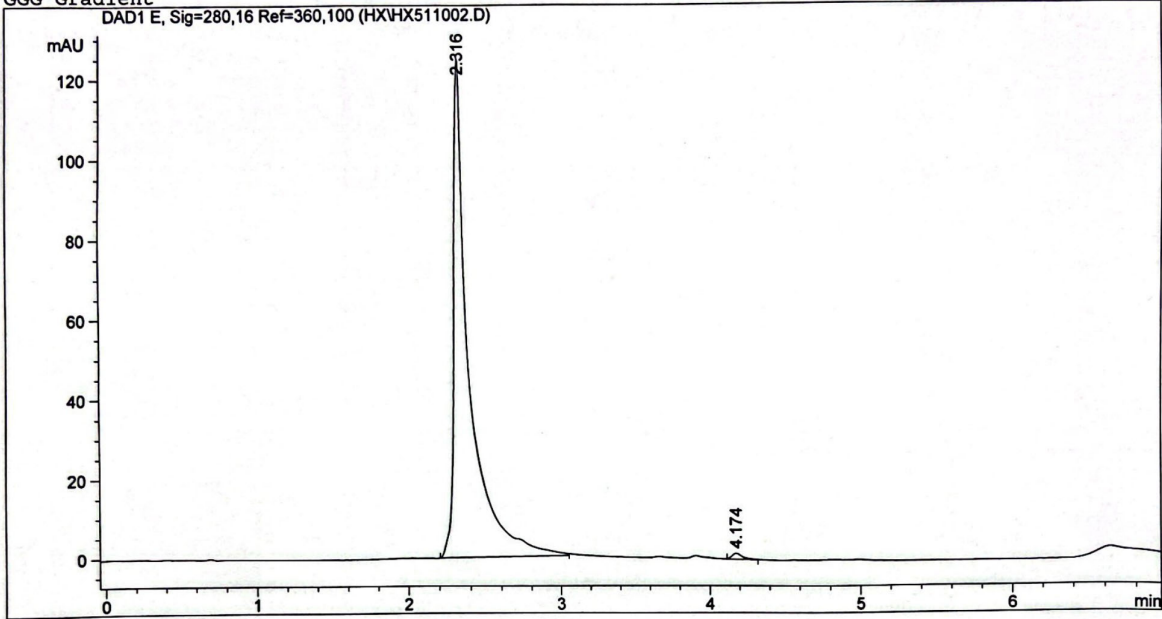

```

=====
                          Area Percent Report
=====

```

```

Sorted By      :      Signal
Multiplier     :      1.0000
Dilution       :      1.0000

```

Signal 1: DAD1 E, Sig=280,16 Ref=360,100

| Peak # | RetTime [min] | Type | Width [min] | Area [mAU*s] | Height [mAU] | Area %  |
|--------|---------------|------|-------------|--------------|--------------|---------|
| 1      | 2.316         | PB   | 0.0974      | 900.70917    | 126.01842    | 99.1198 |
| 2      | 4.174         | BB   | 0.0749      | 7.99829      | 1.58513      | 0.8802  |

```
Totals :                      908.70746  127.60356
```

Results obtained with enhanced integrator!

```

=====
*** End of Report ***

```

```

=====
Injection Date : 5/2/23 2:09:09 PM          Seq. Line : 2
Sample Name    : HX5111-rmBoc              Vial       : 81
Acq. Operator  : HX                       Inj        : 1
                                                Inj Volume : 20 µl
                                                Actual Inj Volume : 5 µl
Different Inj Volume from Sequence !
Method         : D:\HPCHEM\1\METHODS\G GRADRP.M
Last changed   : 4/19/23 9:26:05 AM by hua
GGG Gradient
    
```

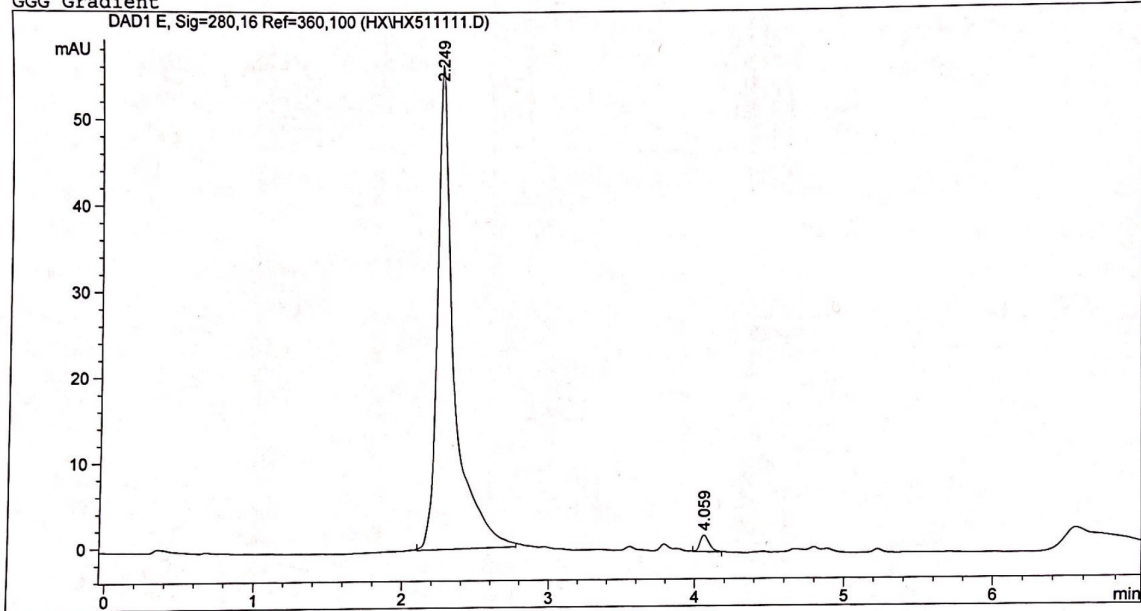

=====  
 Area Percent Report  
 =====

```

Sorted By      : Signal
Multiplier     : 1.0000
Dilution       : 1.0000
    
```

Signal 1: DAD1 E, Sig=280,16 Ref=360,100

| Peak # | RetTime [min] | Type | Width [min] | Area [mAU*s] | Height [mAU] | Area %  |
|--------|---------------|------|-------------|--------------|--------------|---------|
| 1      | 2.249         | BB   | 0.1053      | 443.41479    | 56.67936     | 98.1224 |
| 2      | 4.059         | BB   | 0.0663      | 8.48492      | 1.96818      | 1.8776  |

Totals :                      451.89971    58.64753

Results obtained with enhanced integrator!

=====  
 \*\*\* End of Report \*\*\*

# <sup>1</sup>H and <sup>13</sup>C NMR spectrum

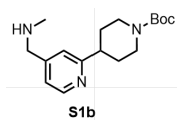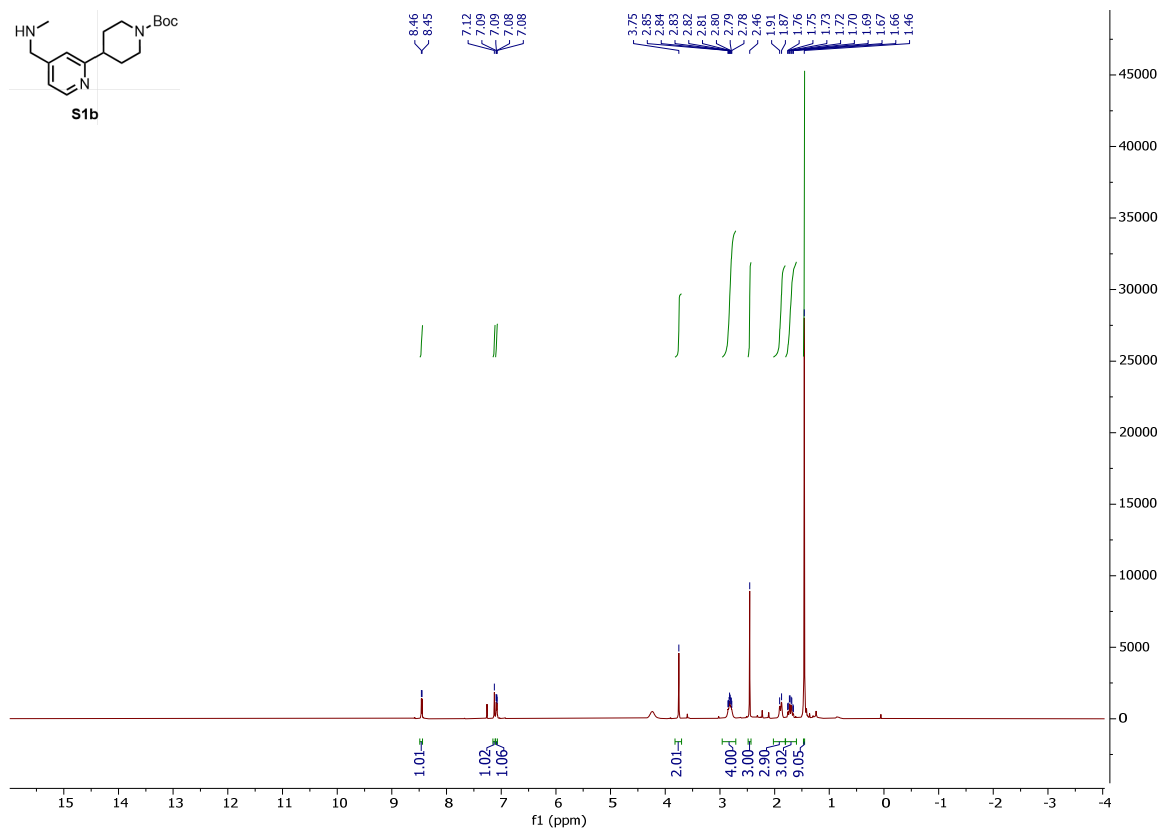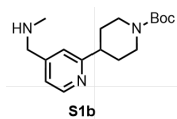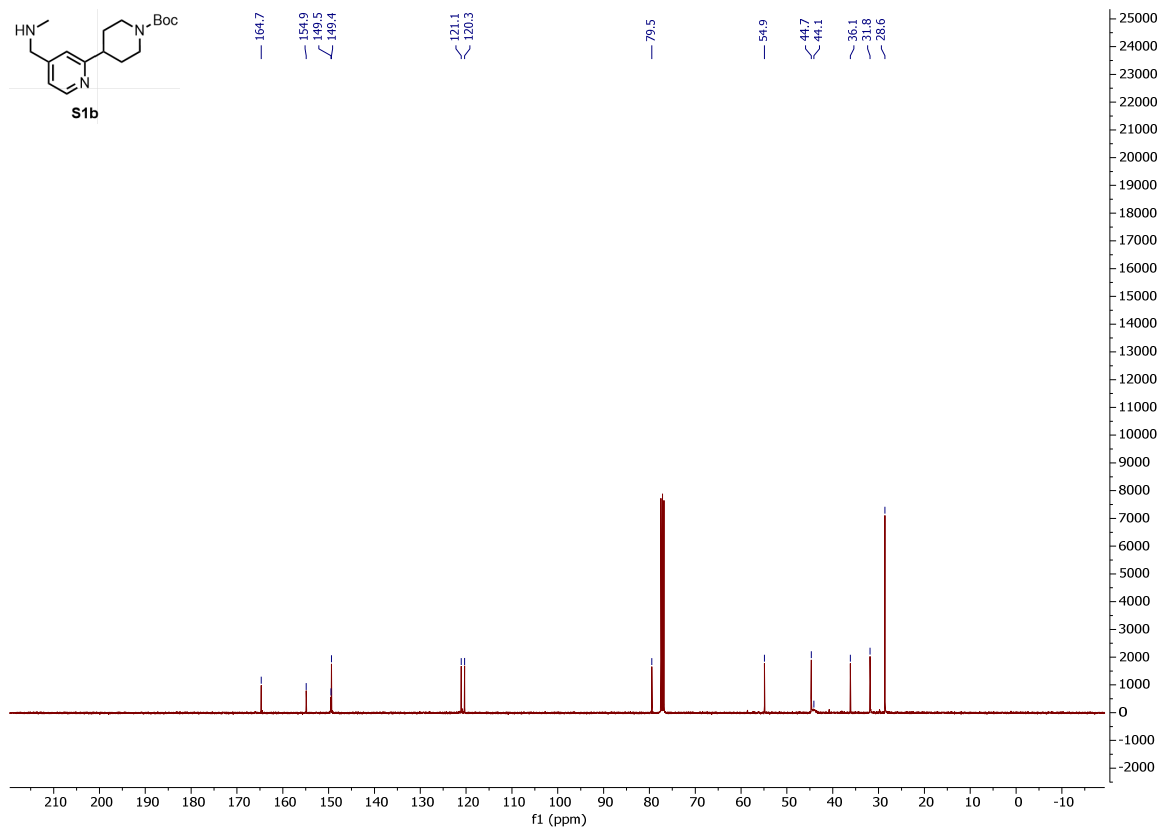



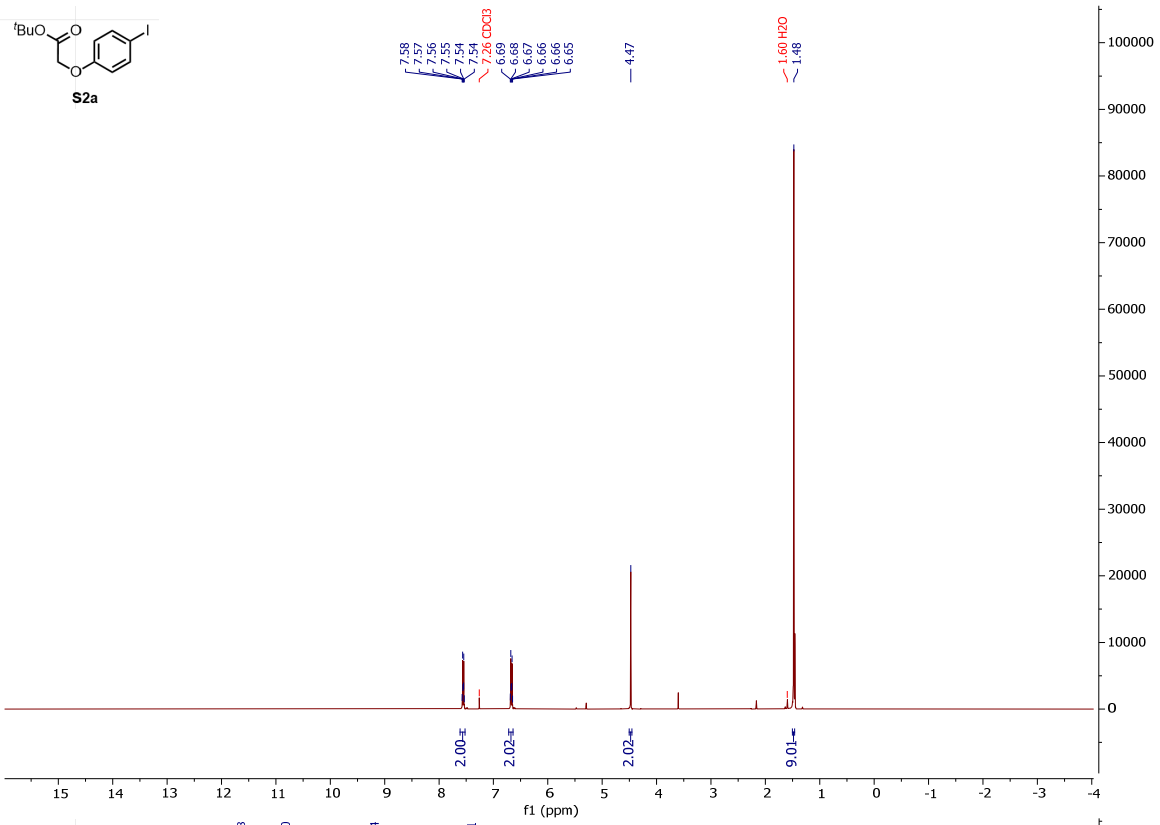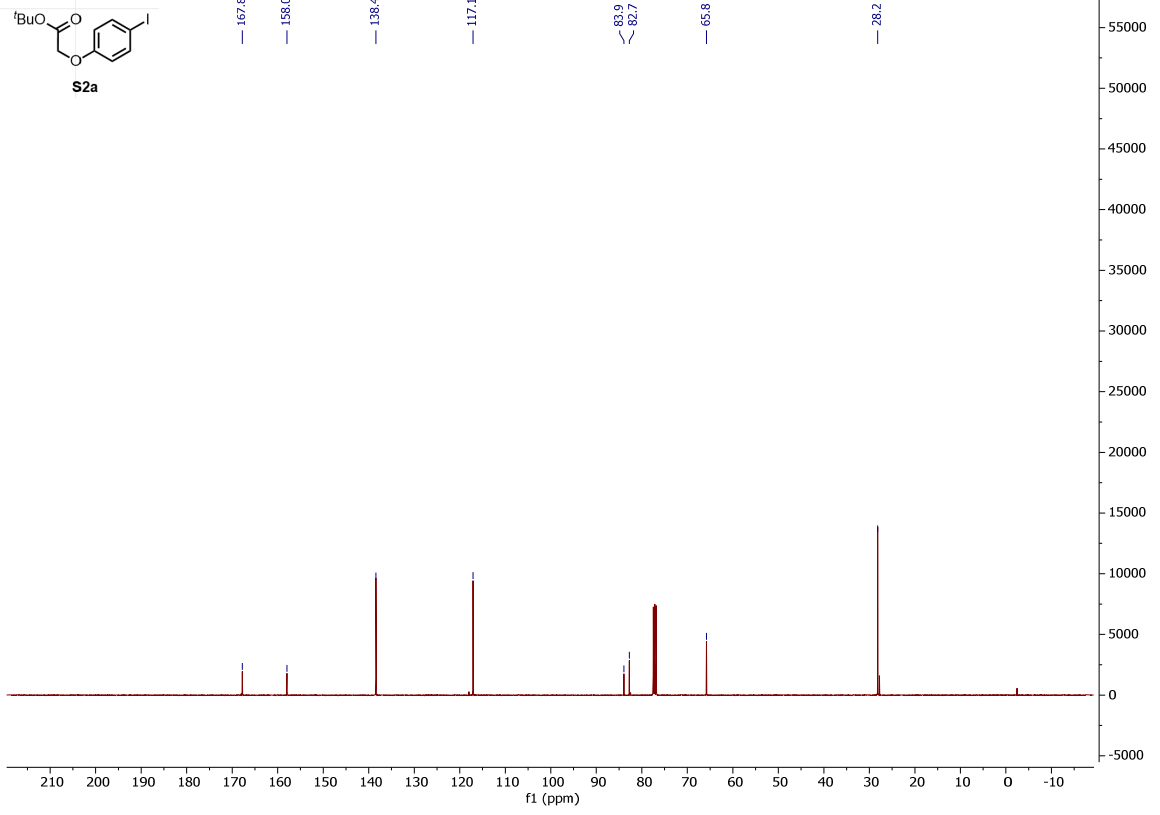

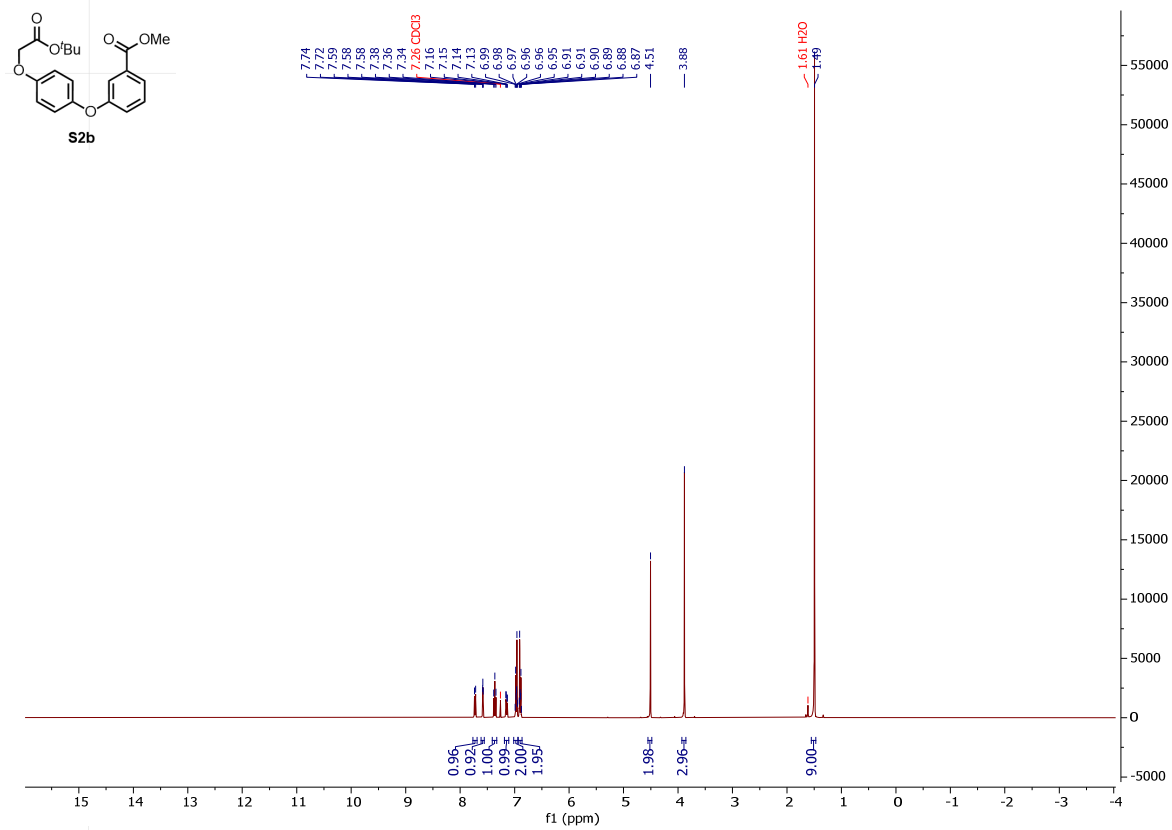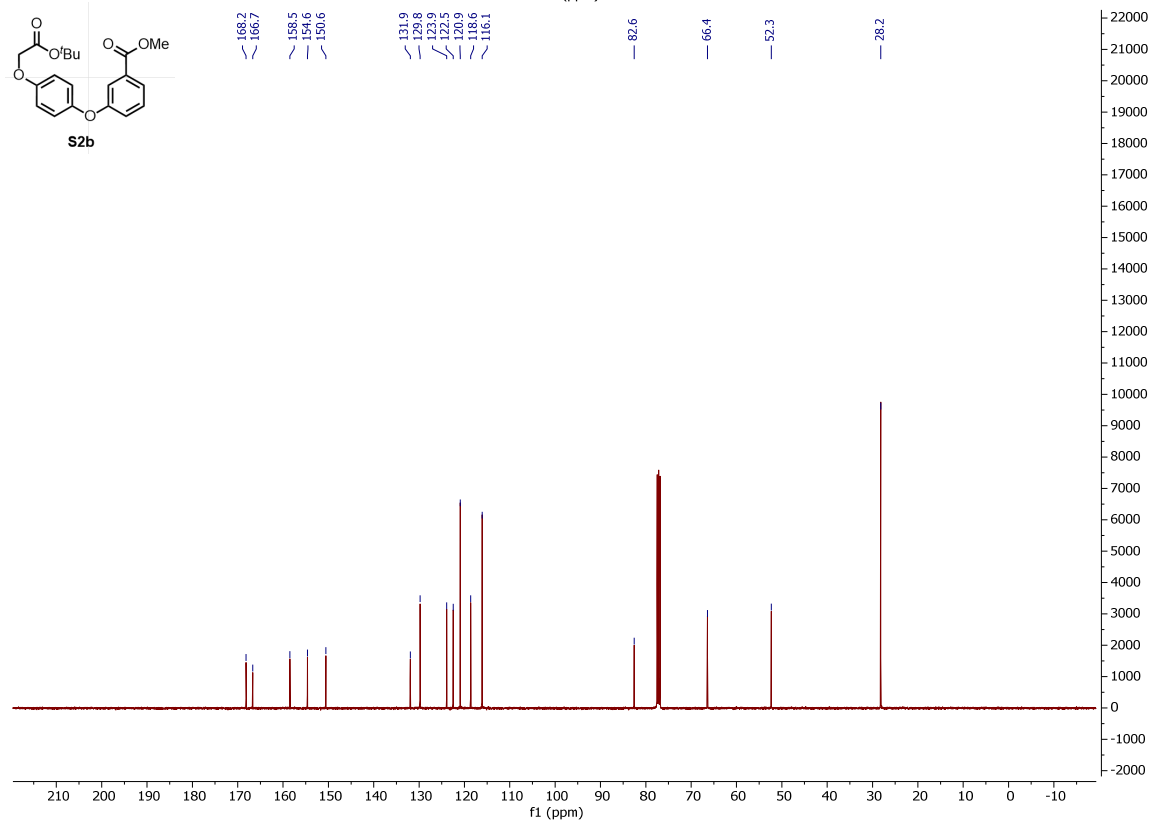

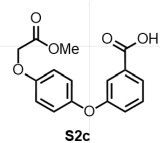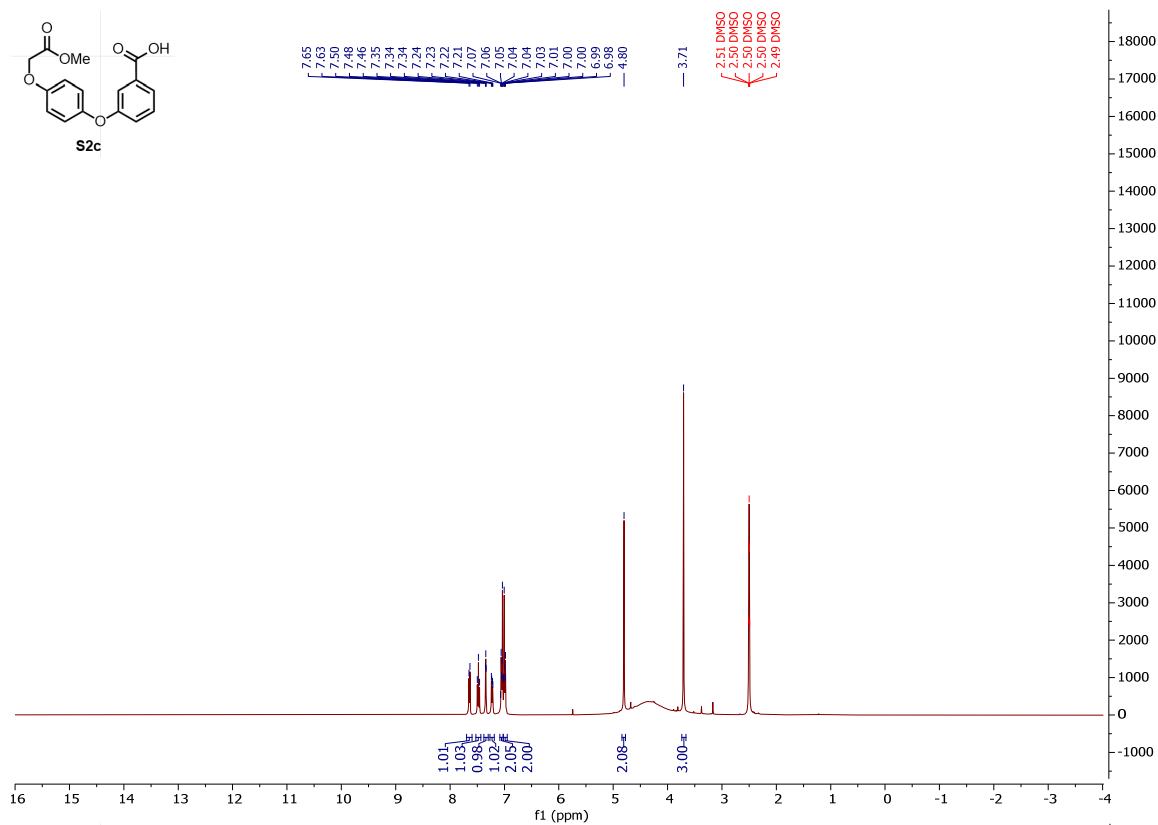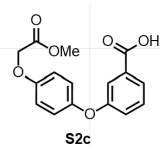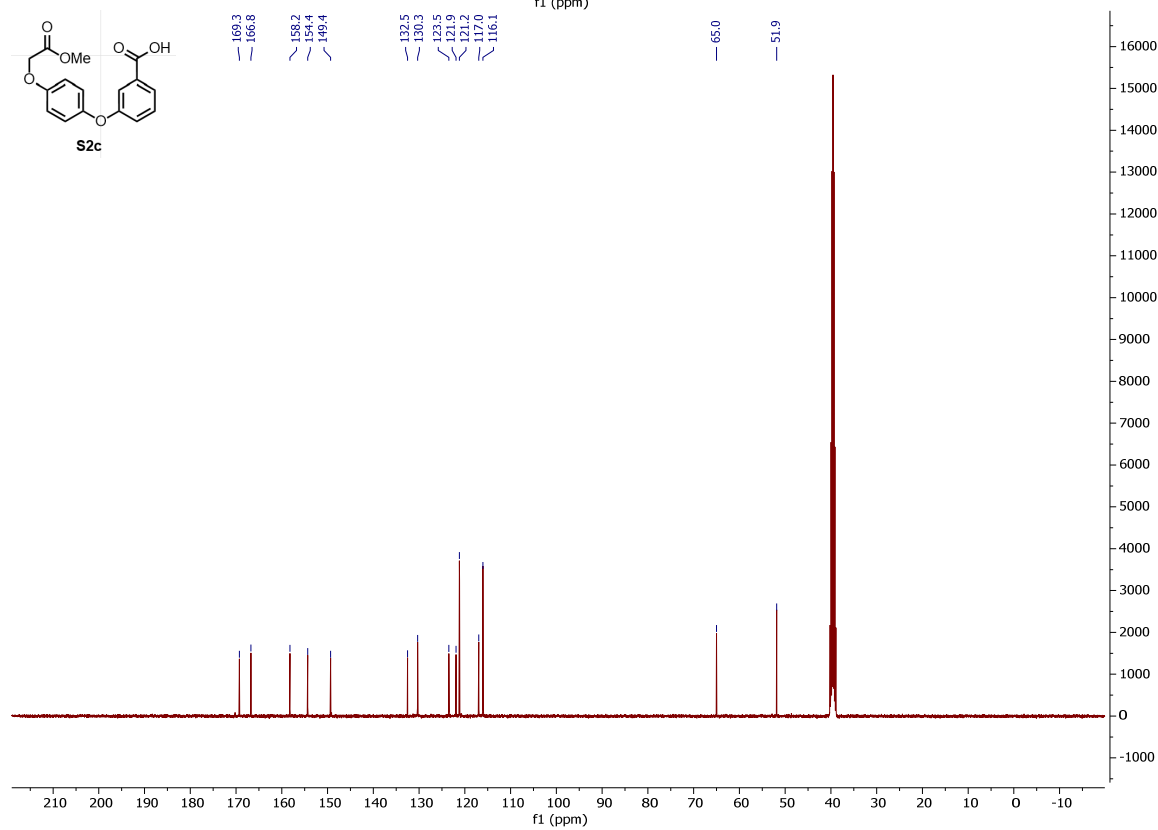

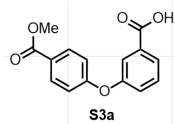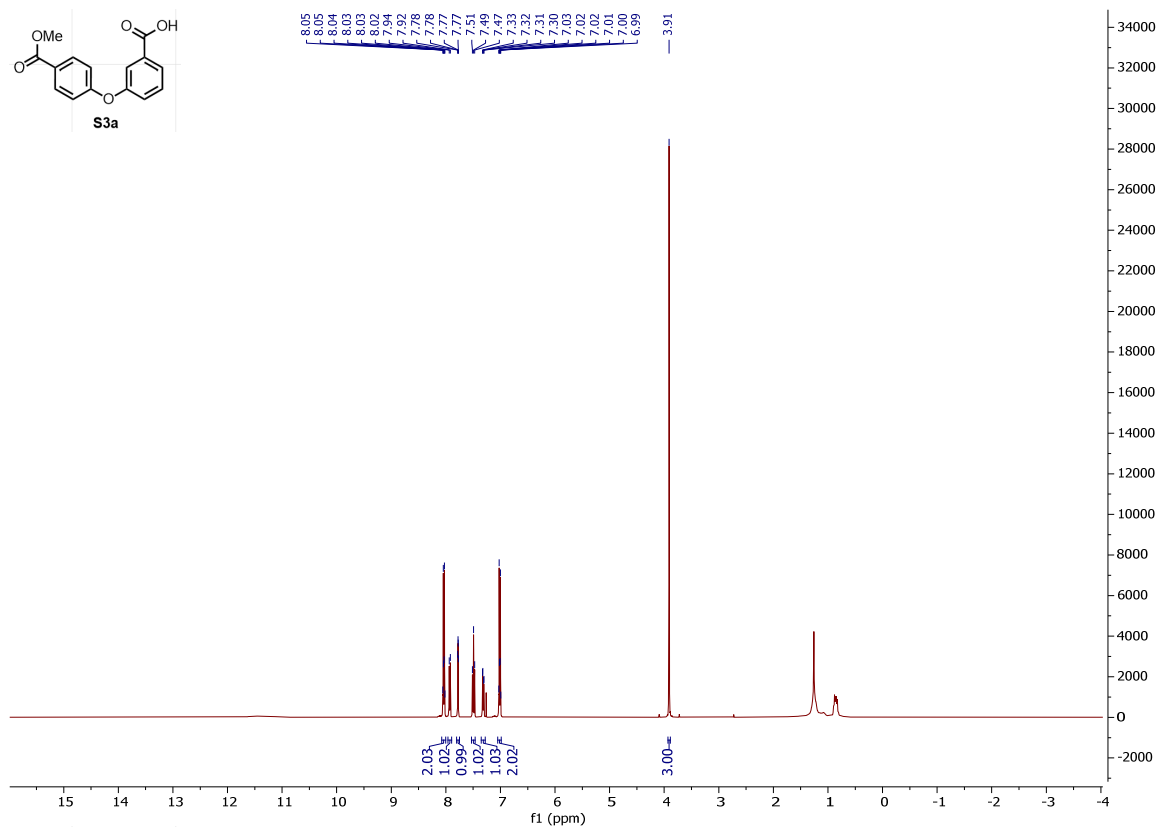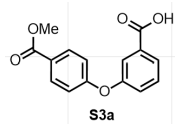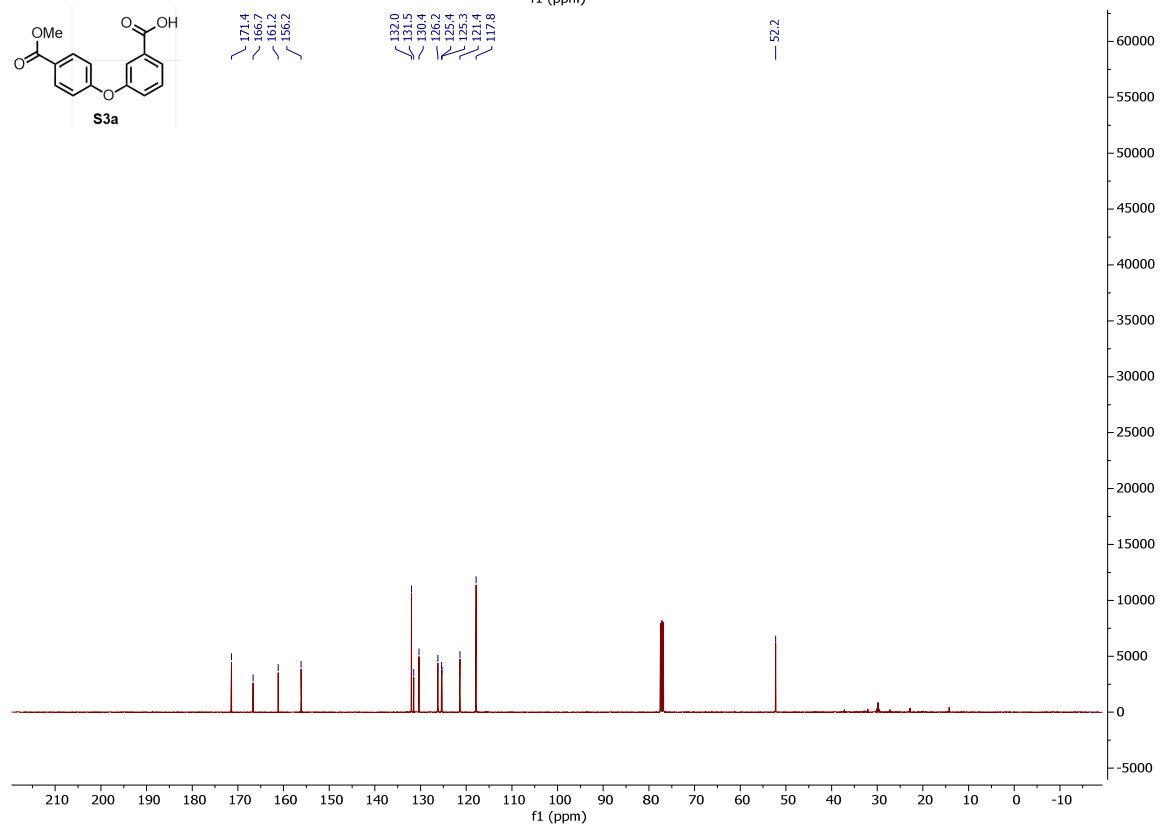

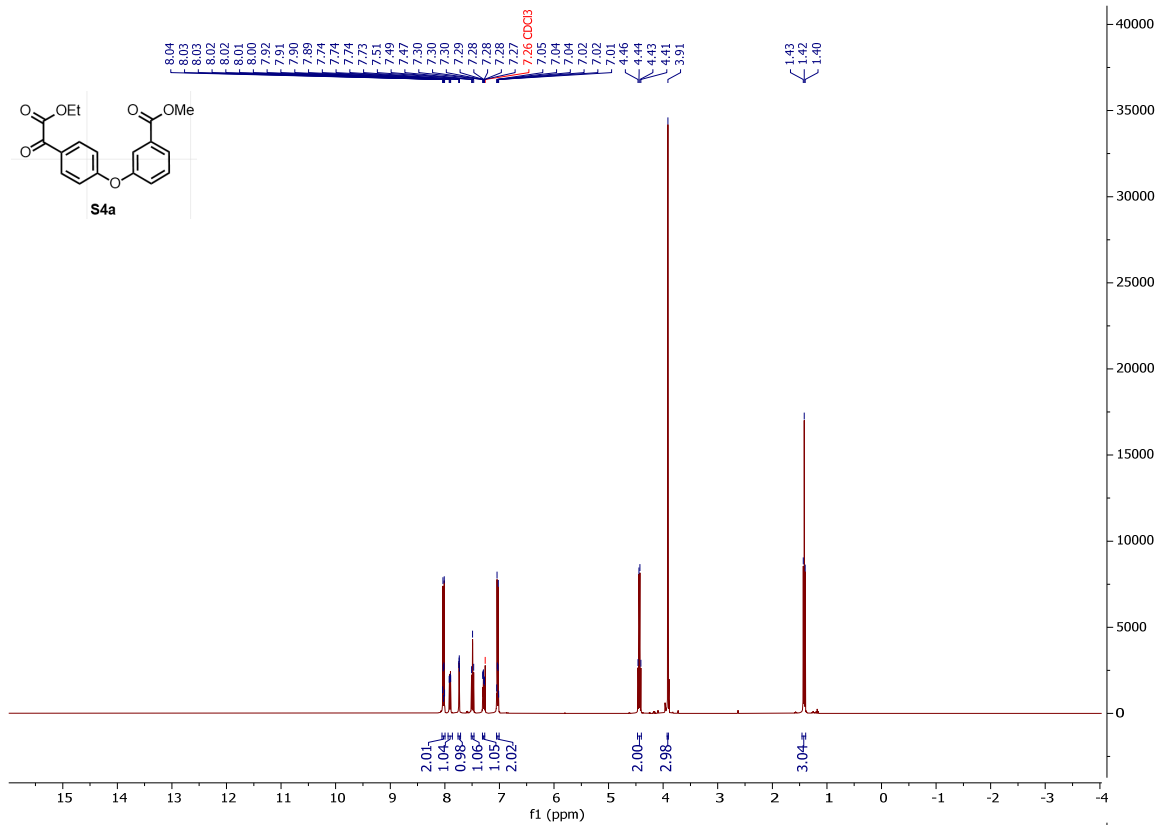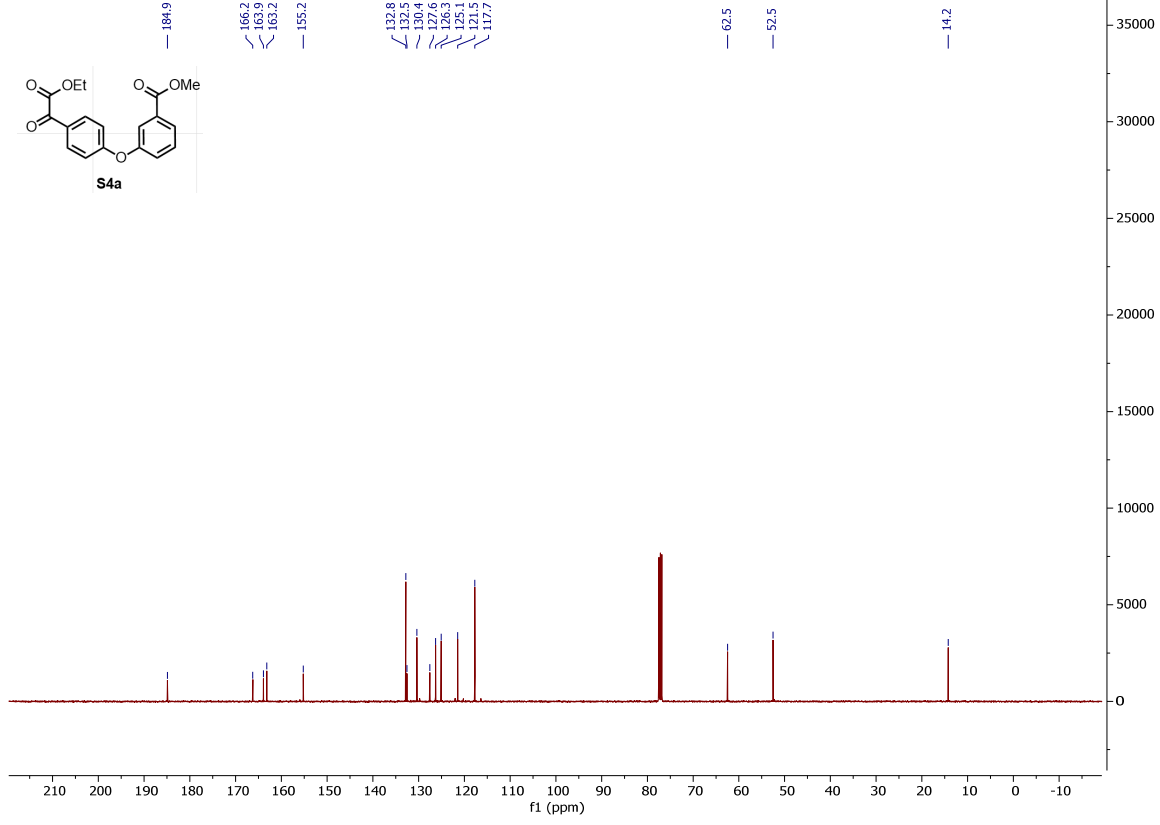

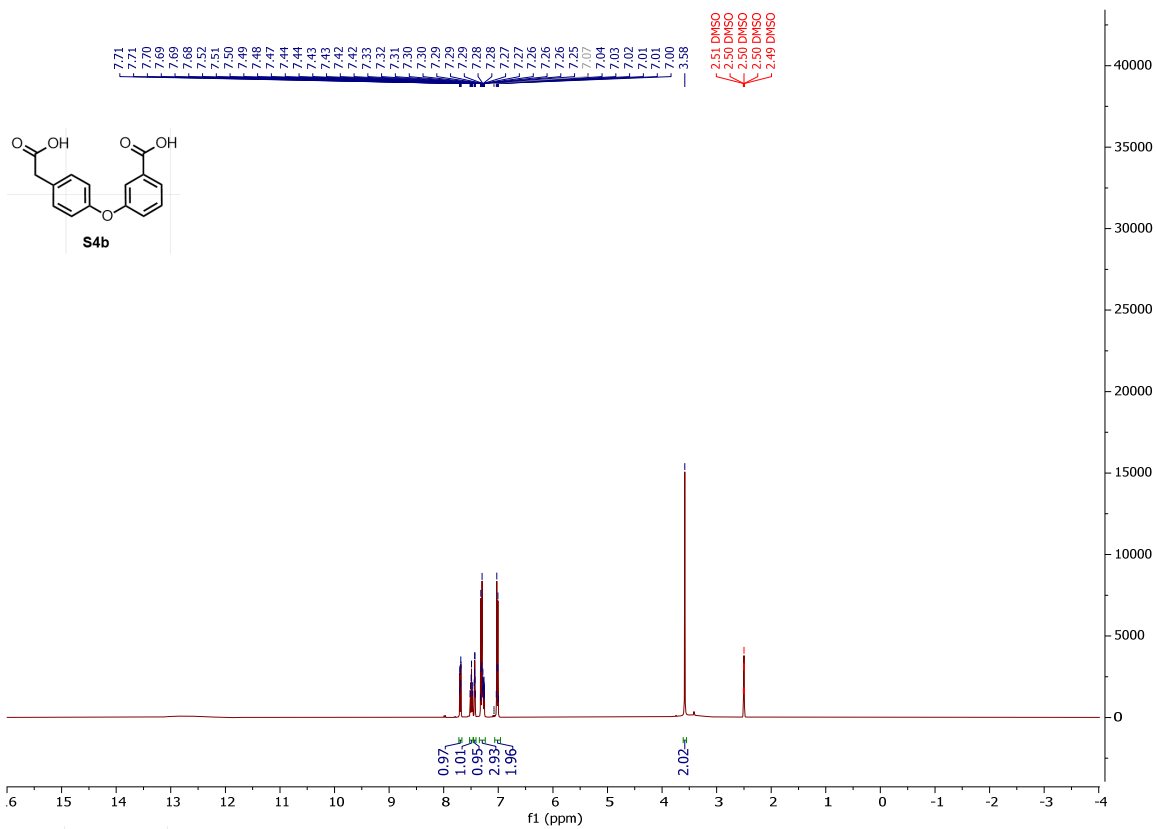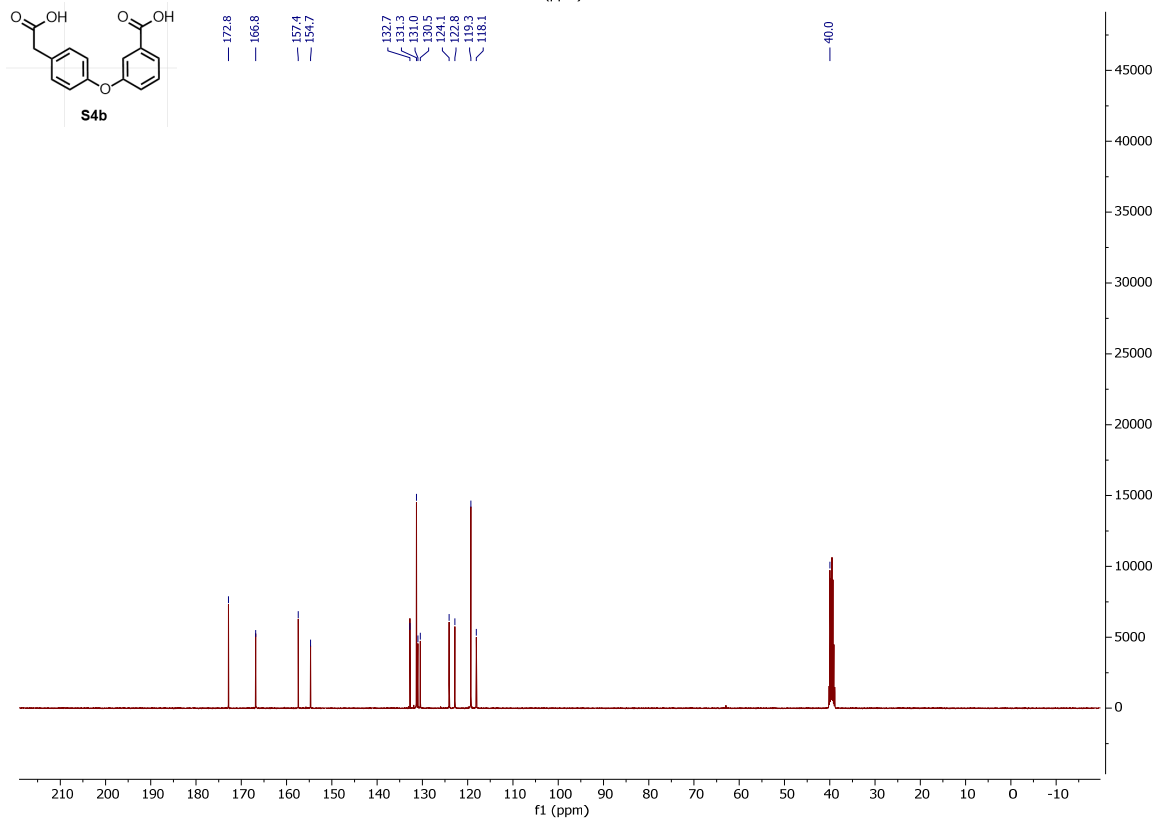



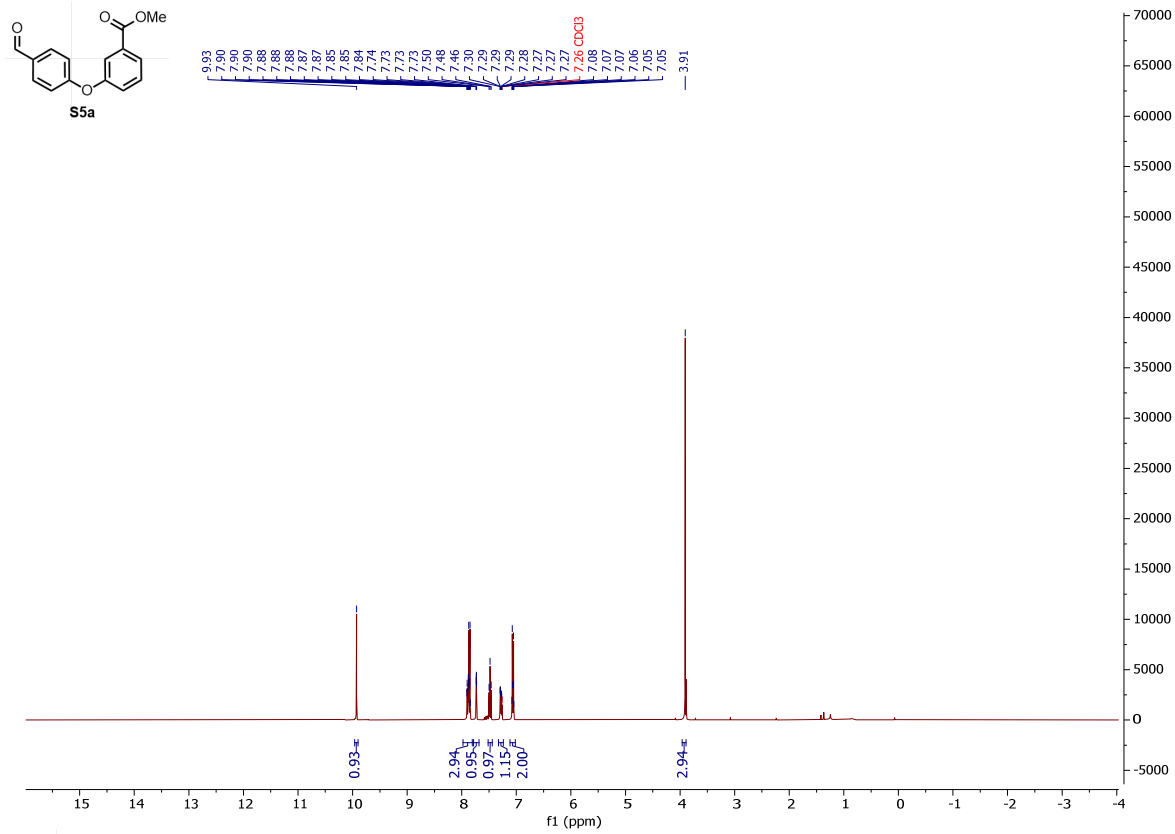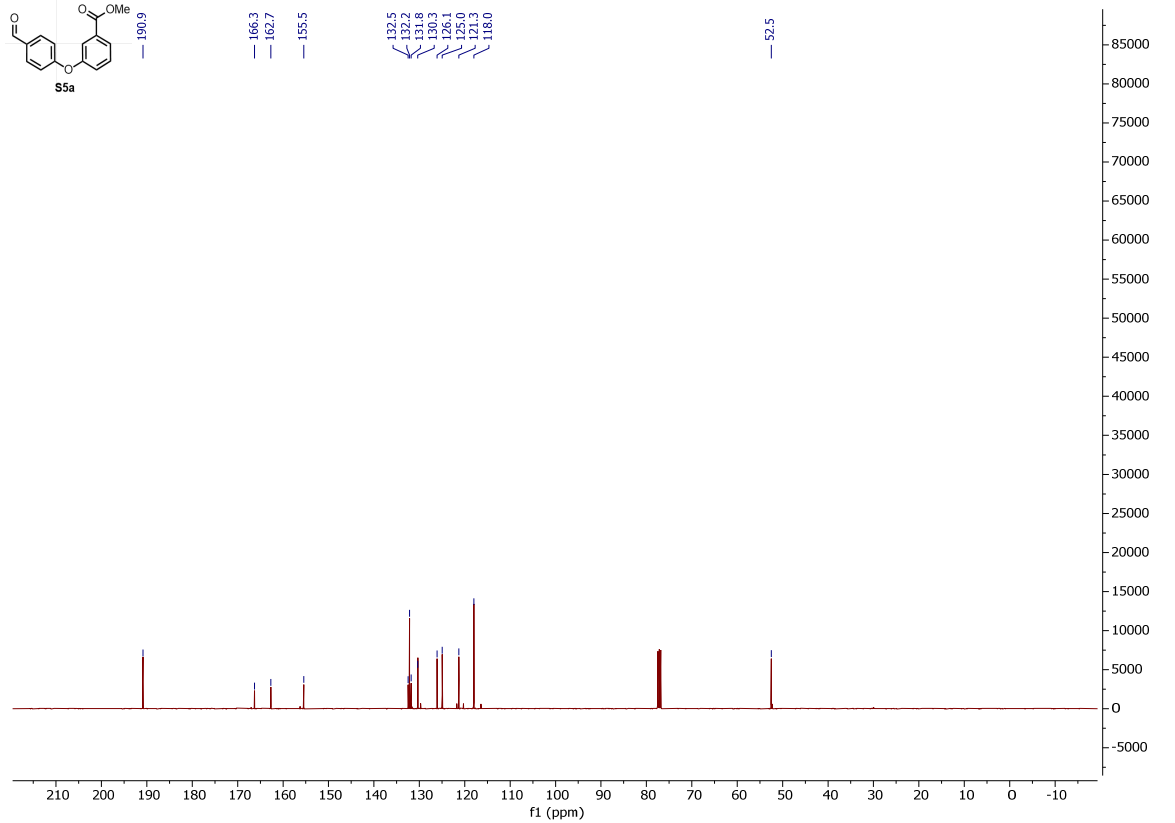



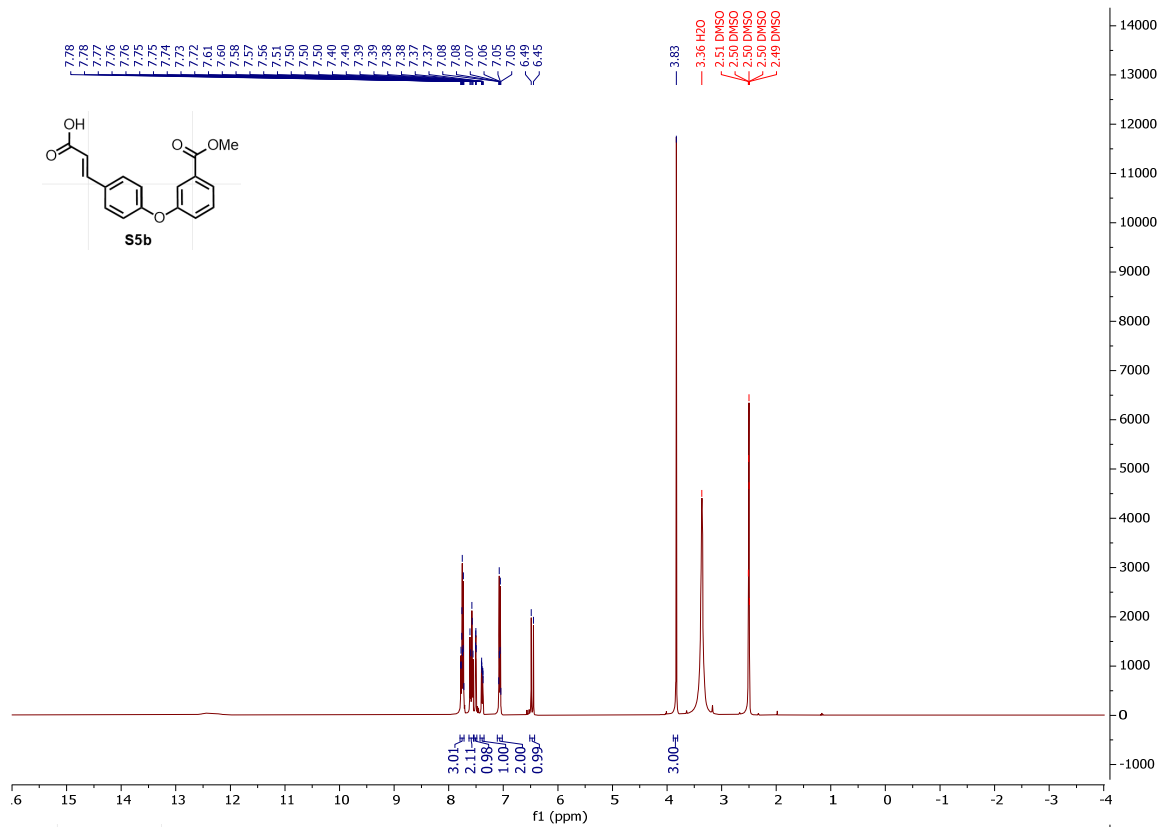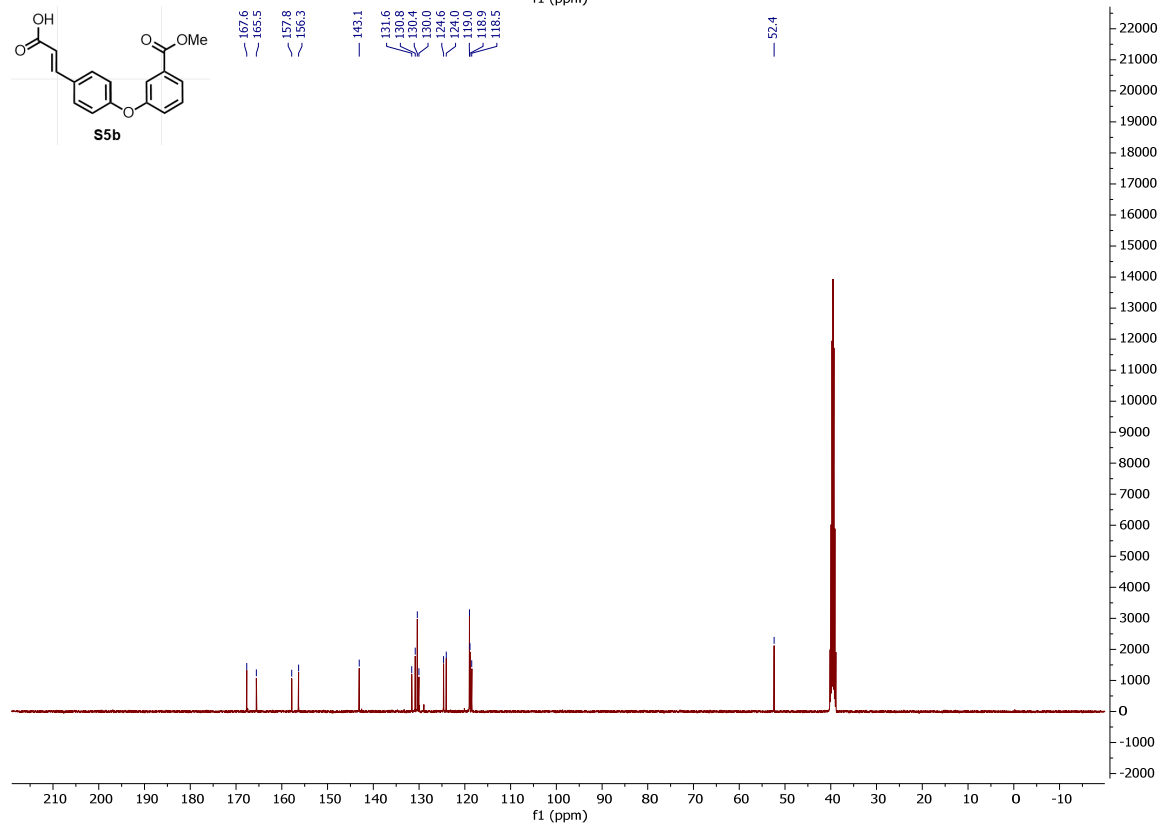

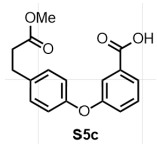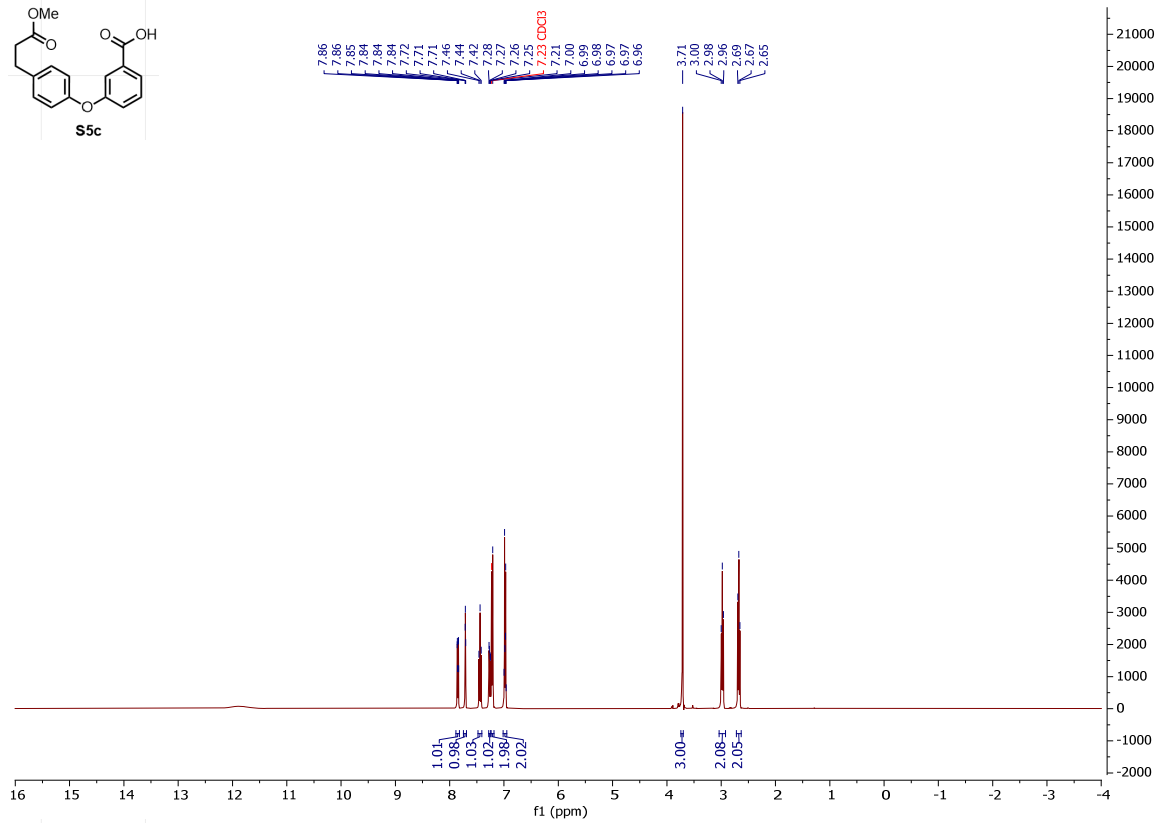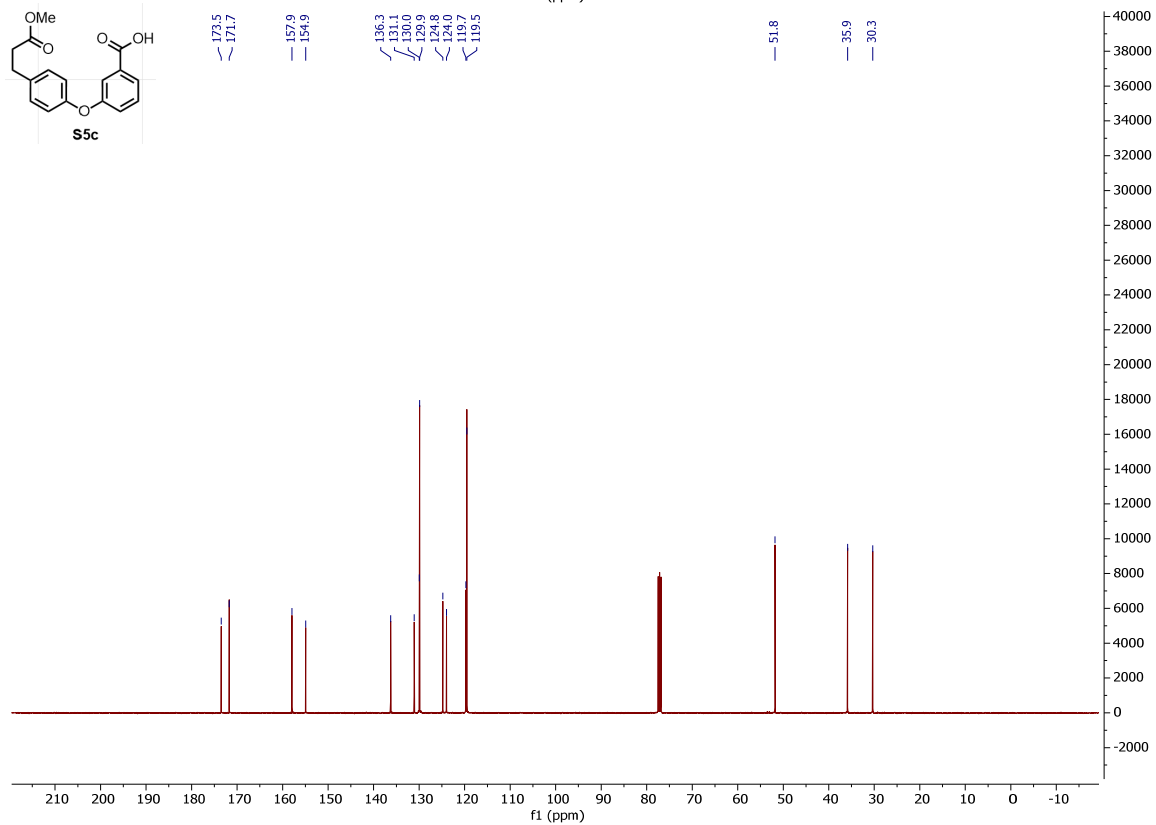

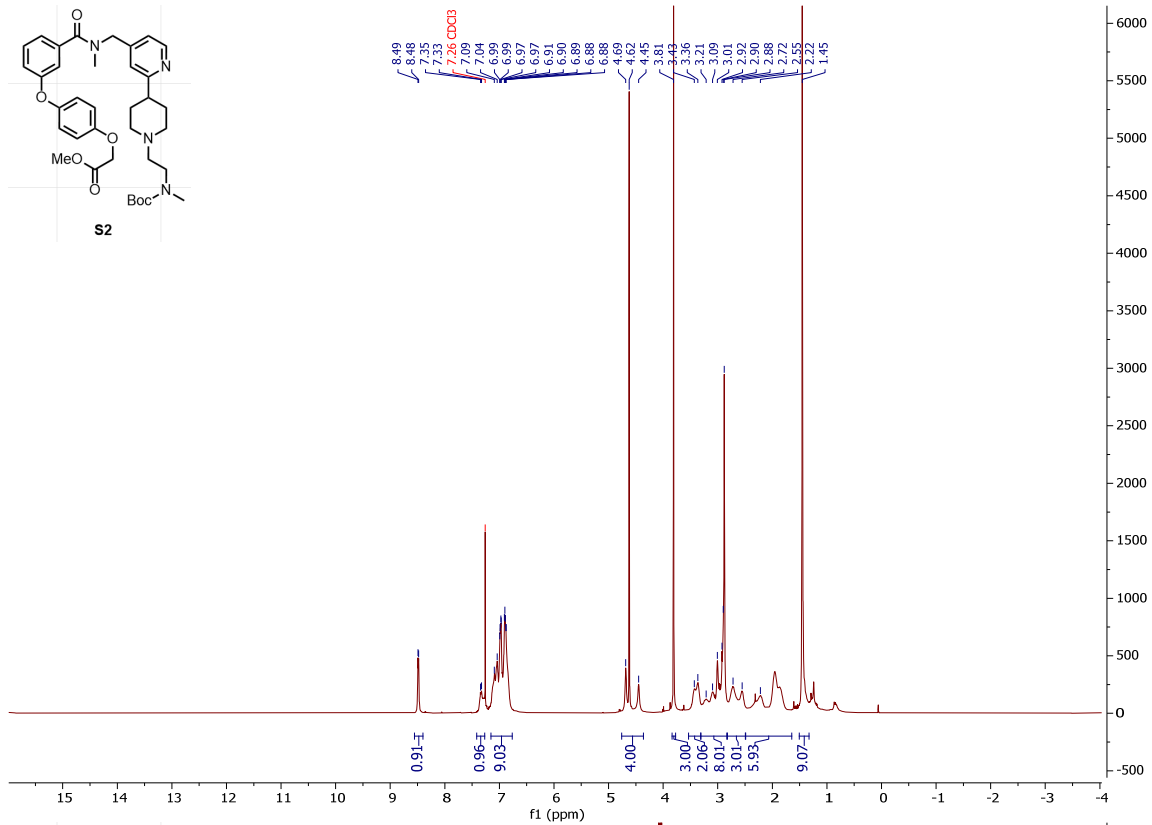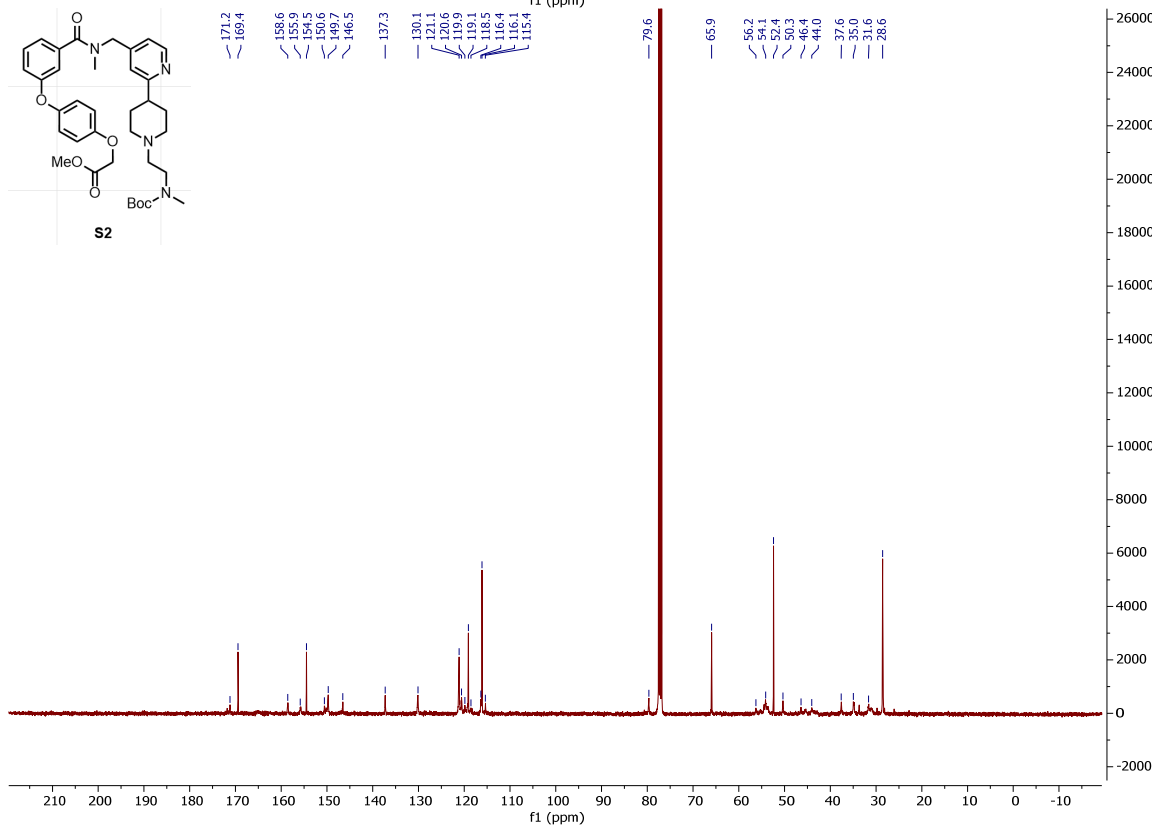

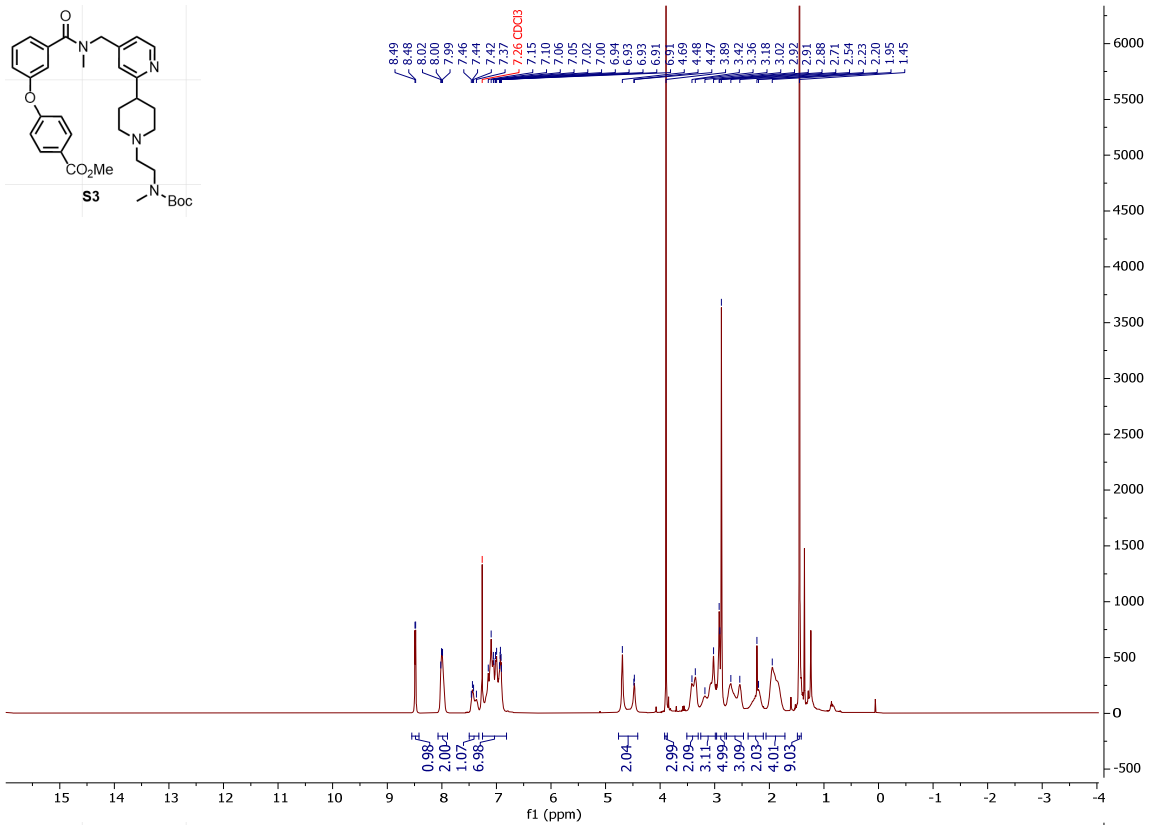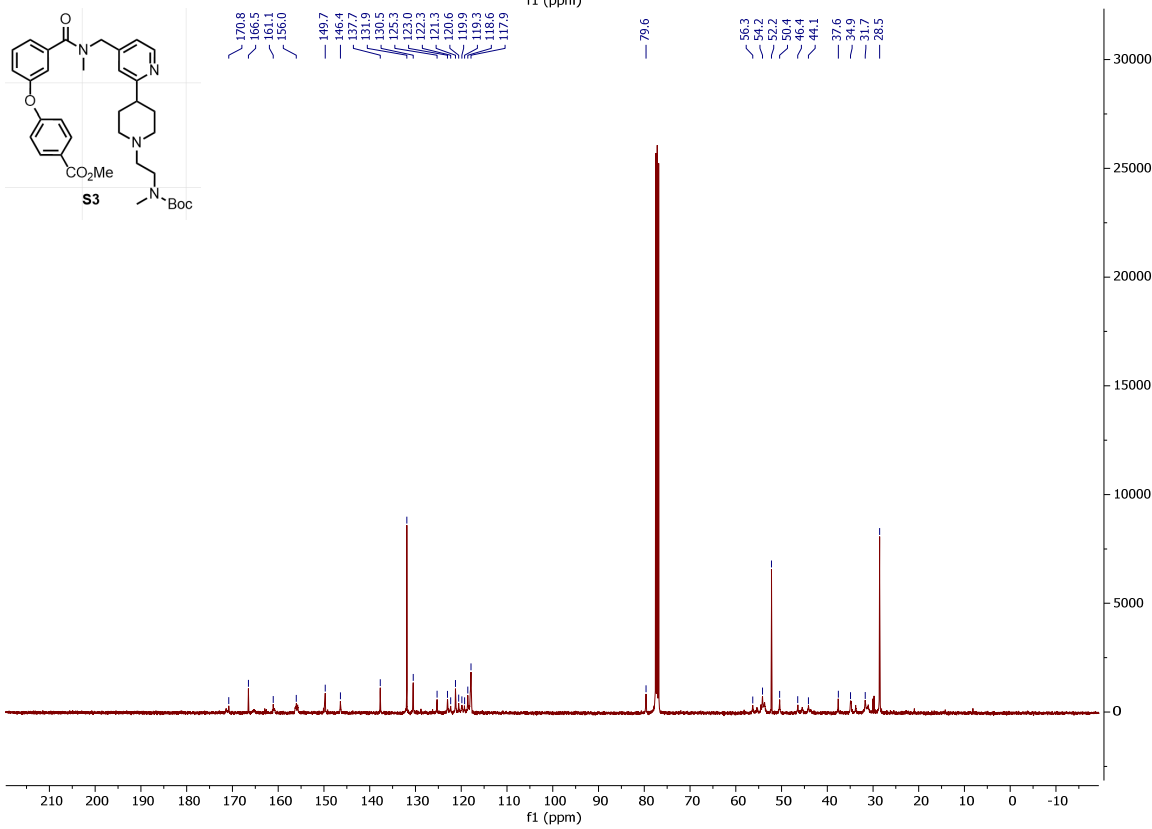

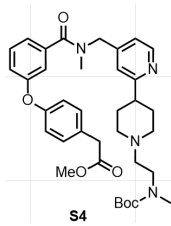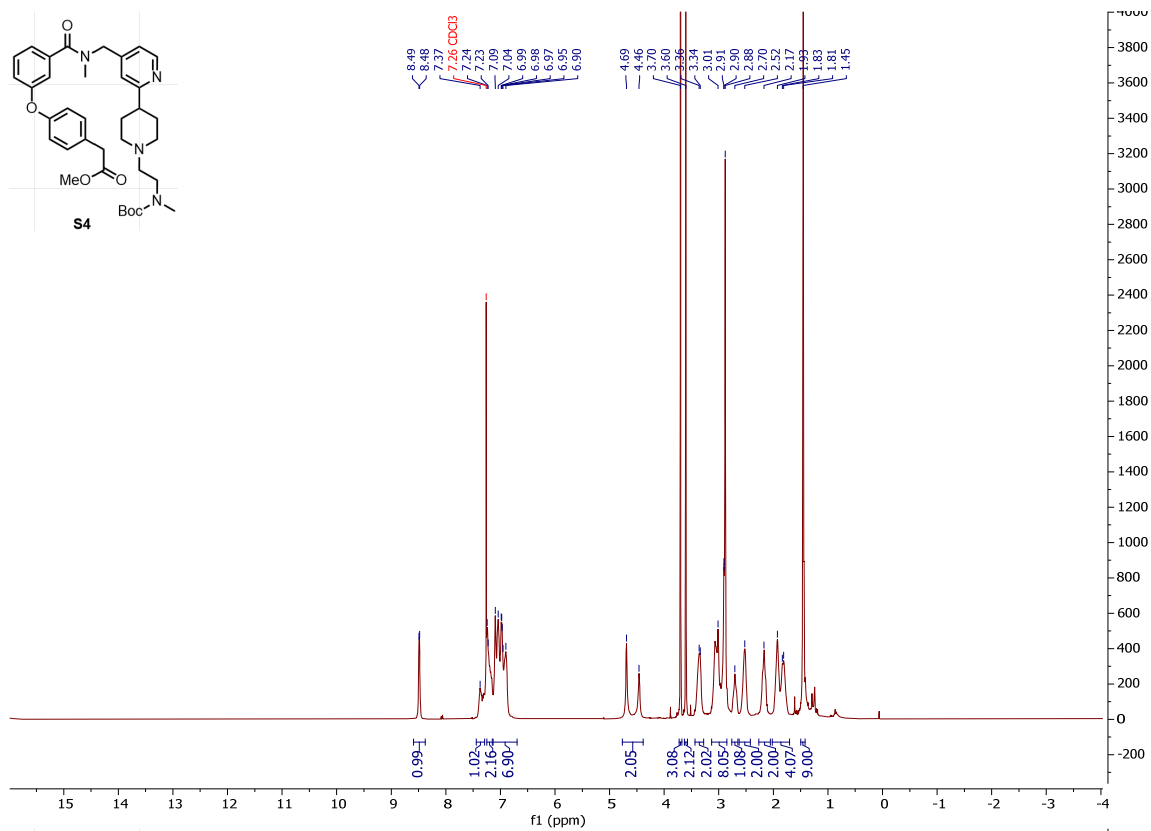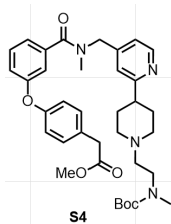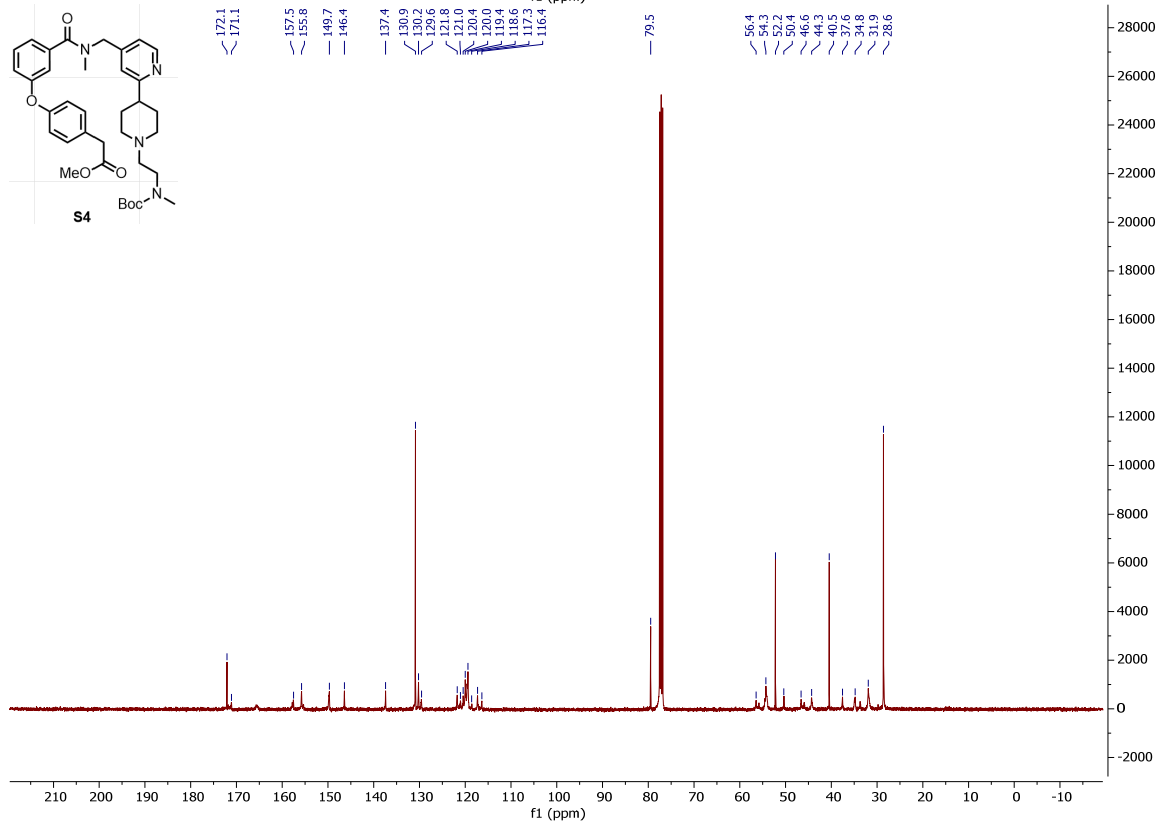

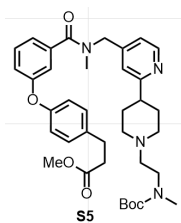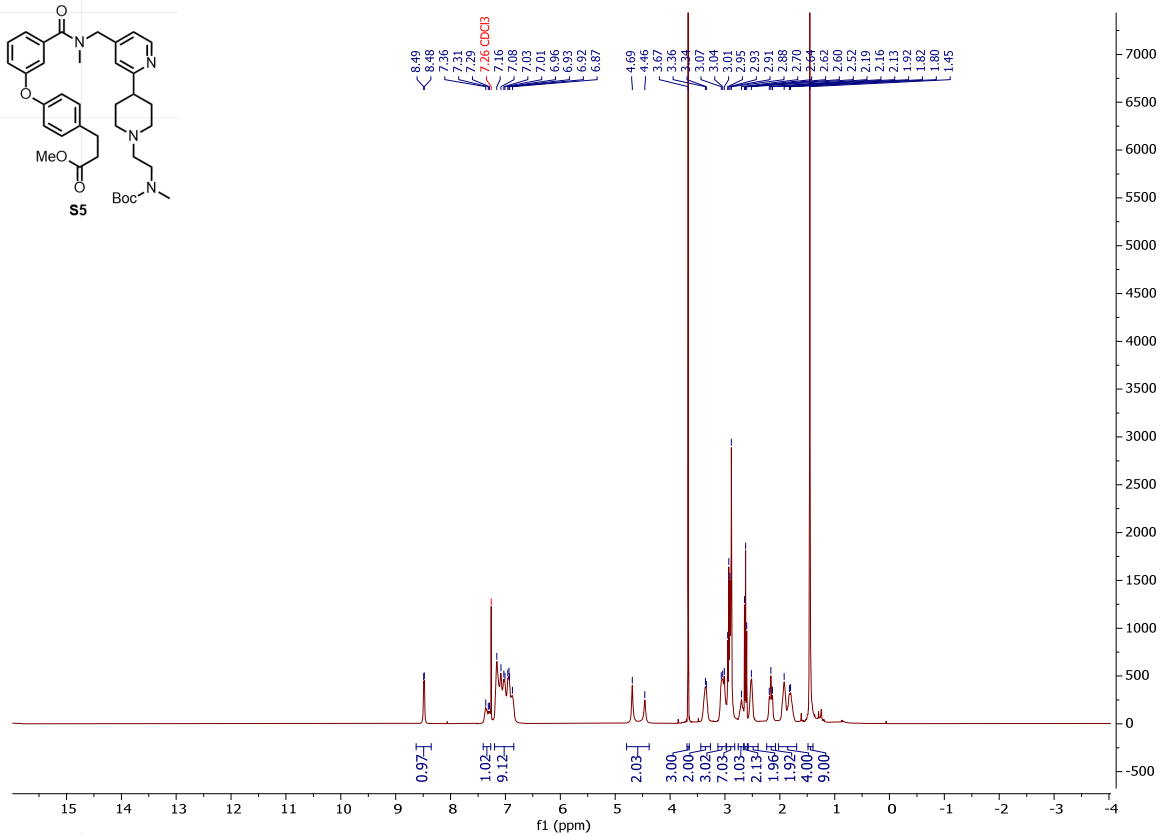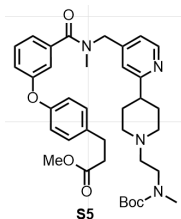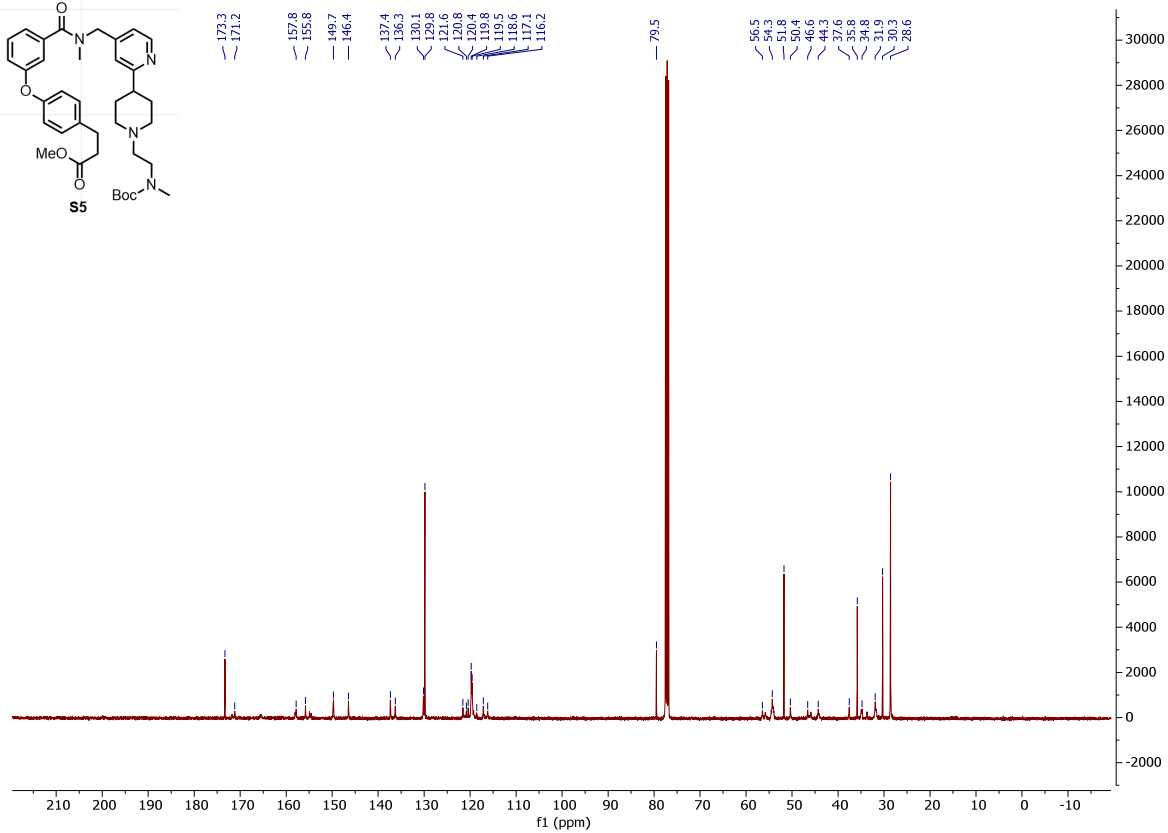

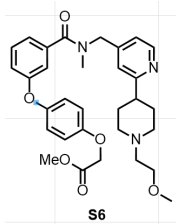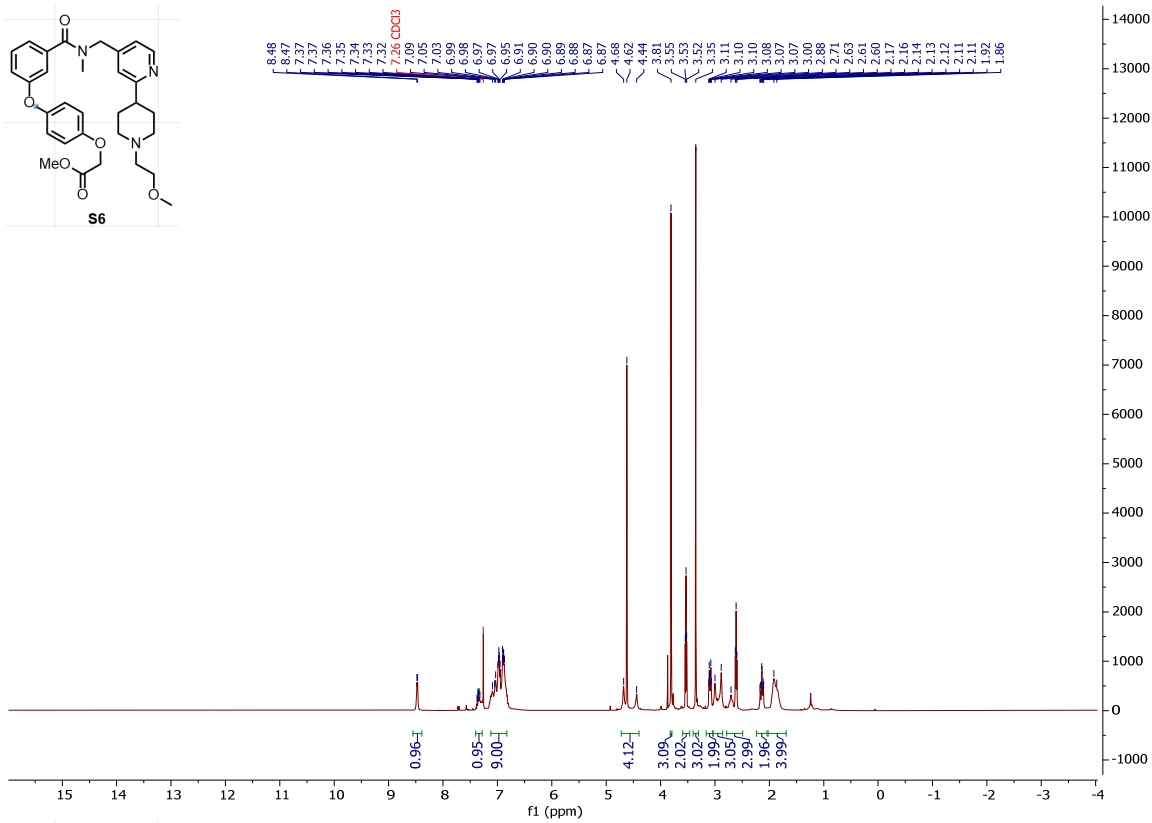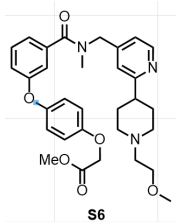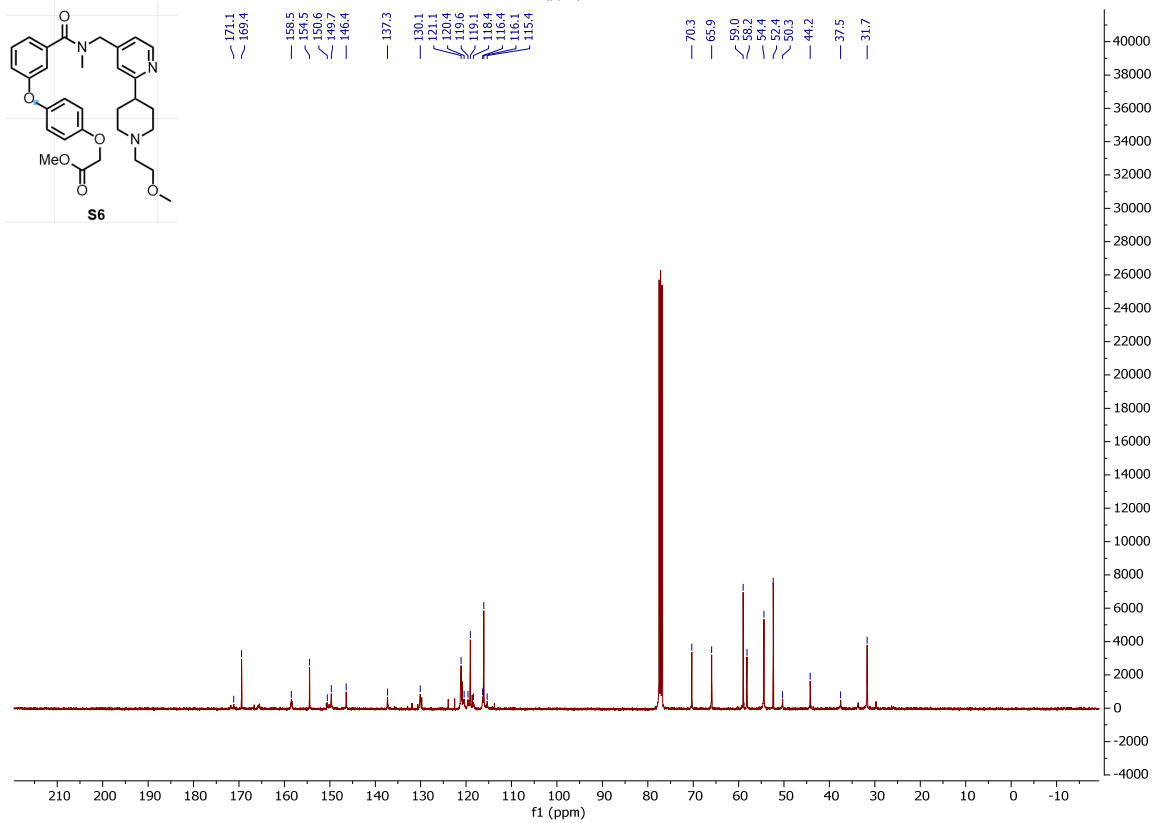

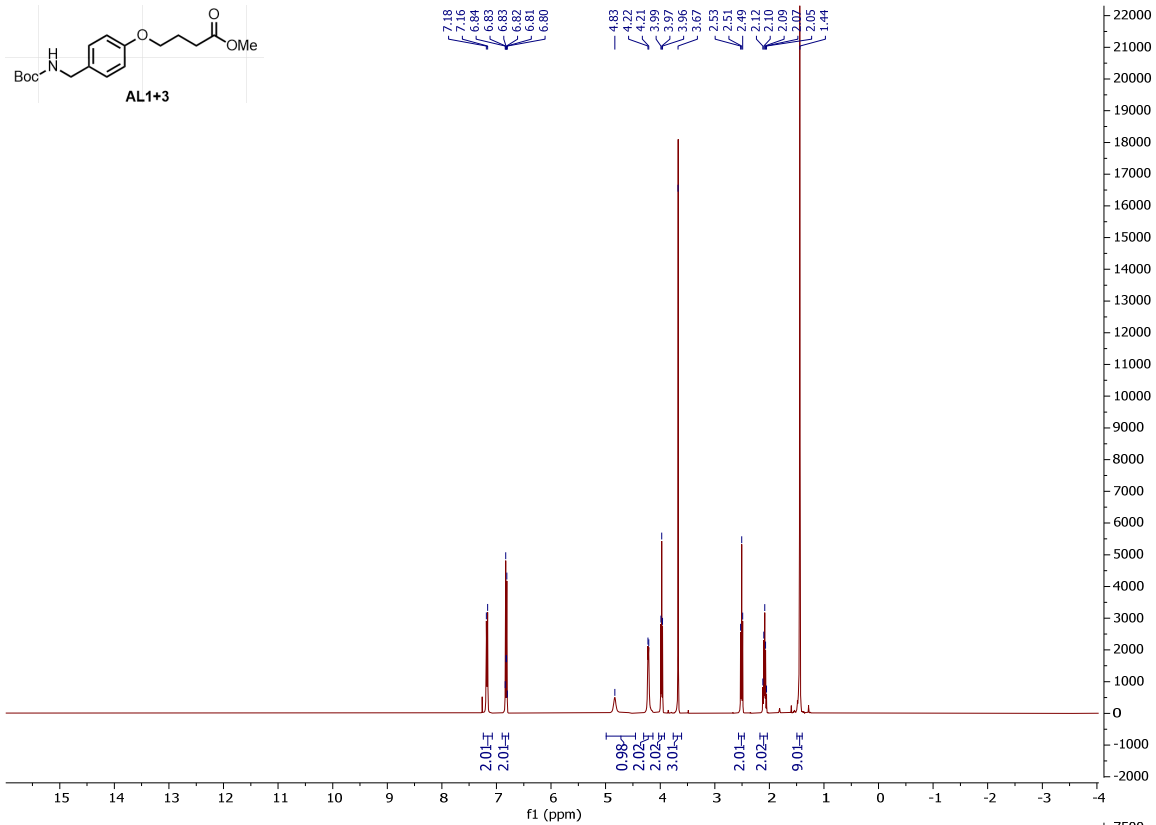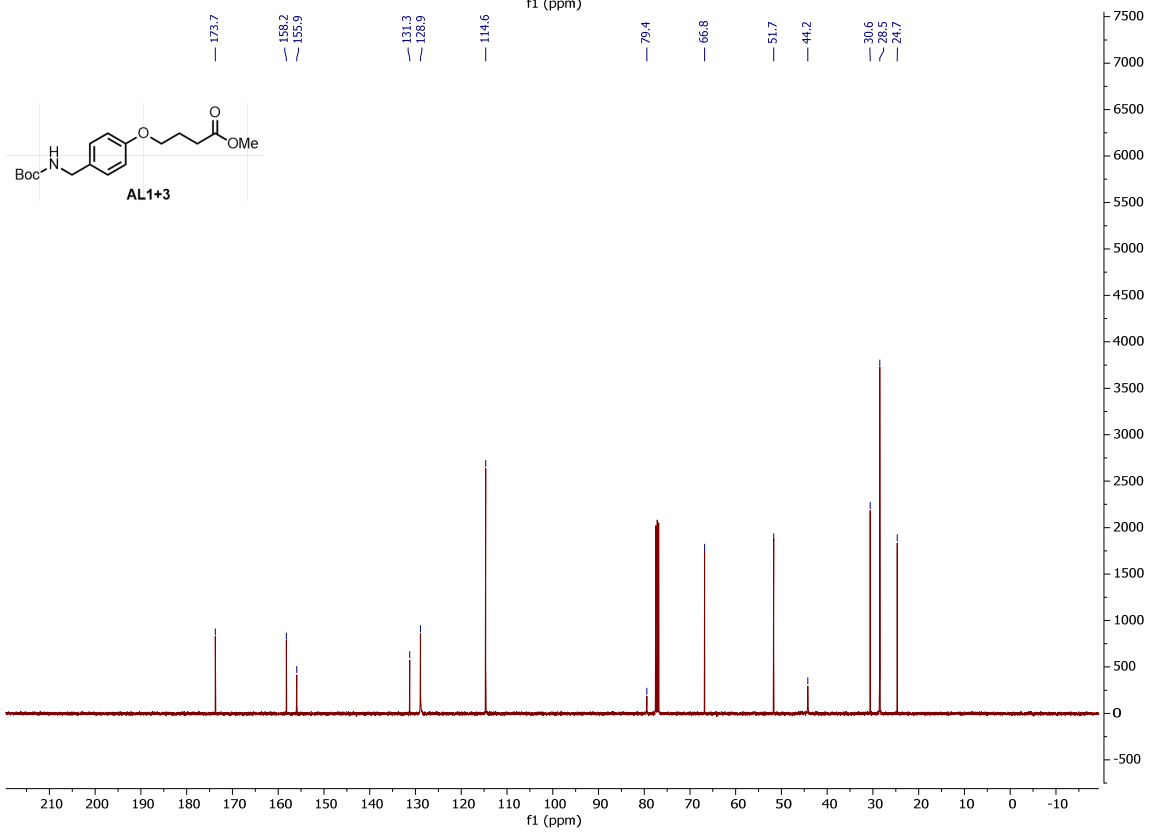



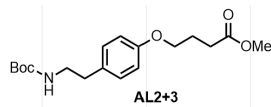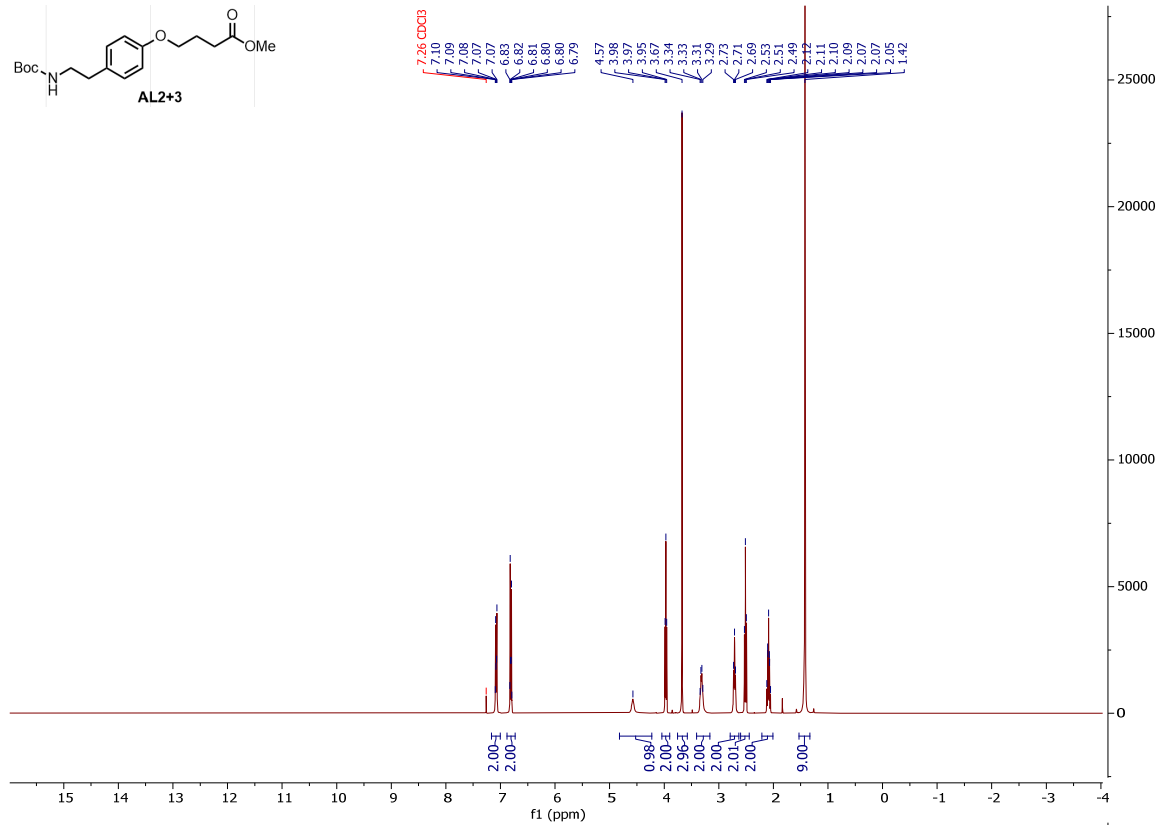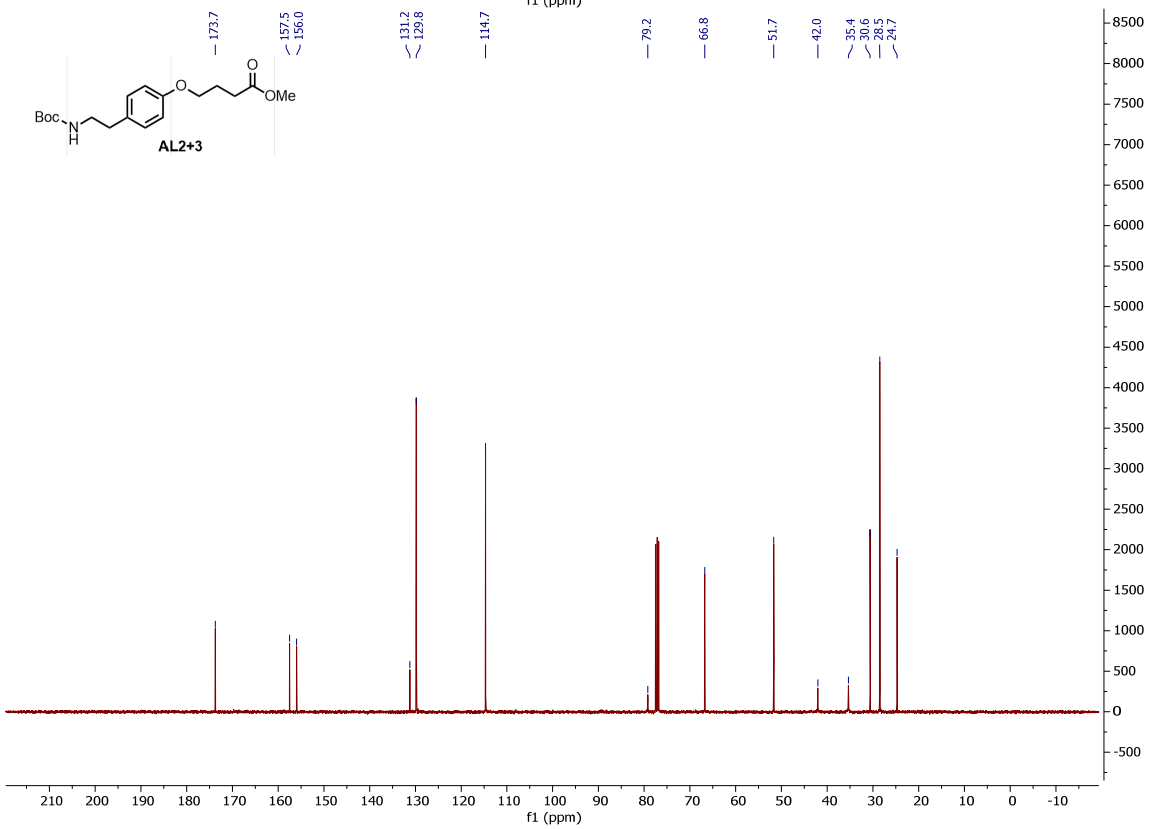

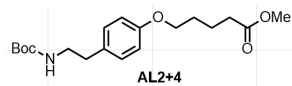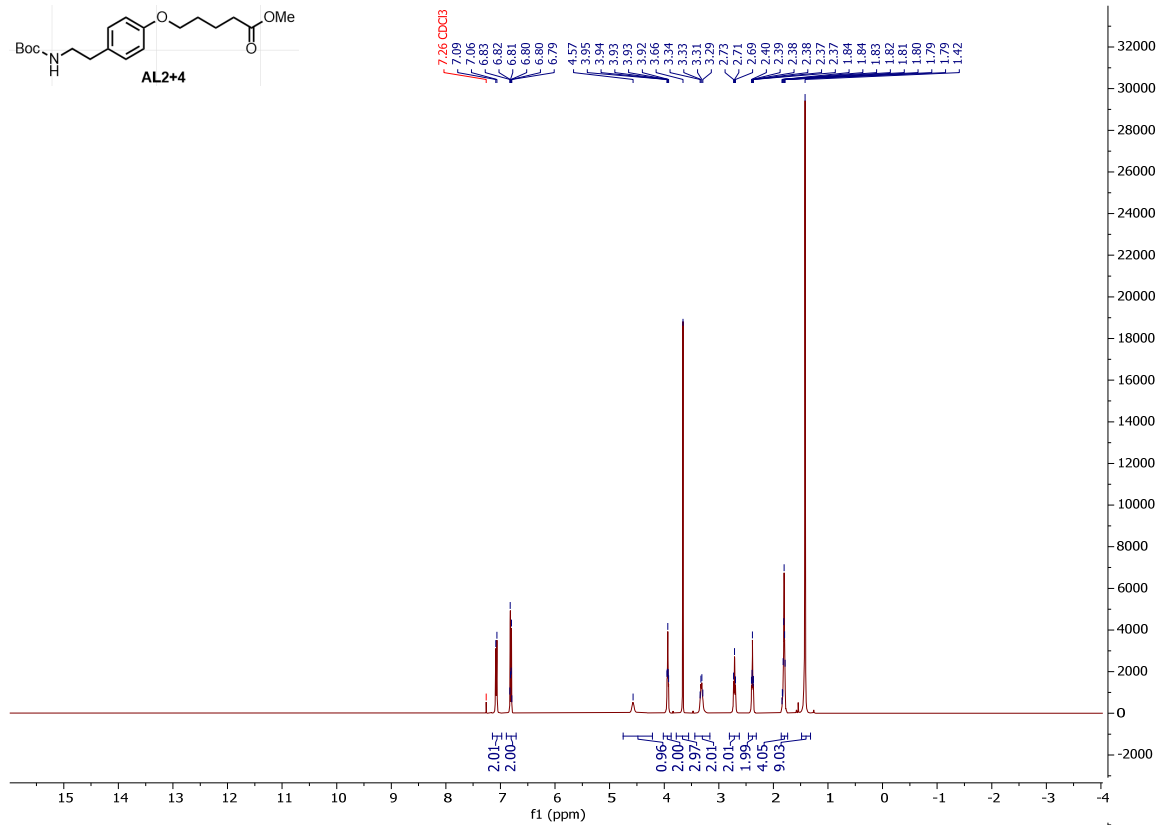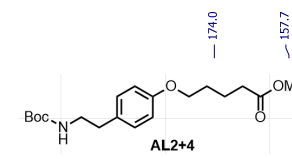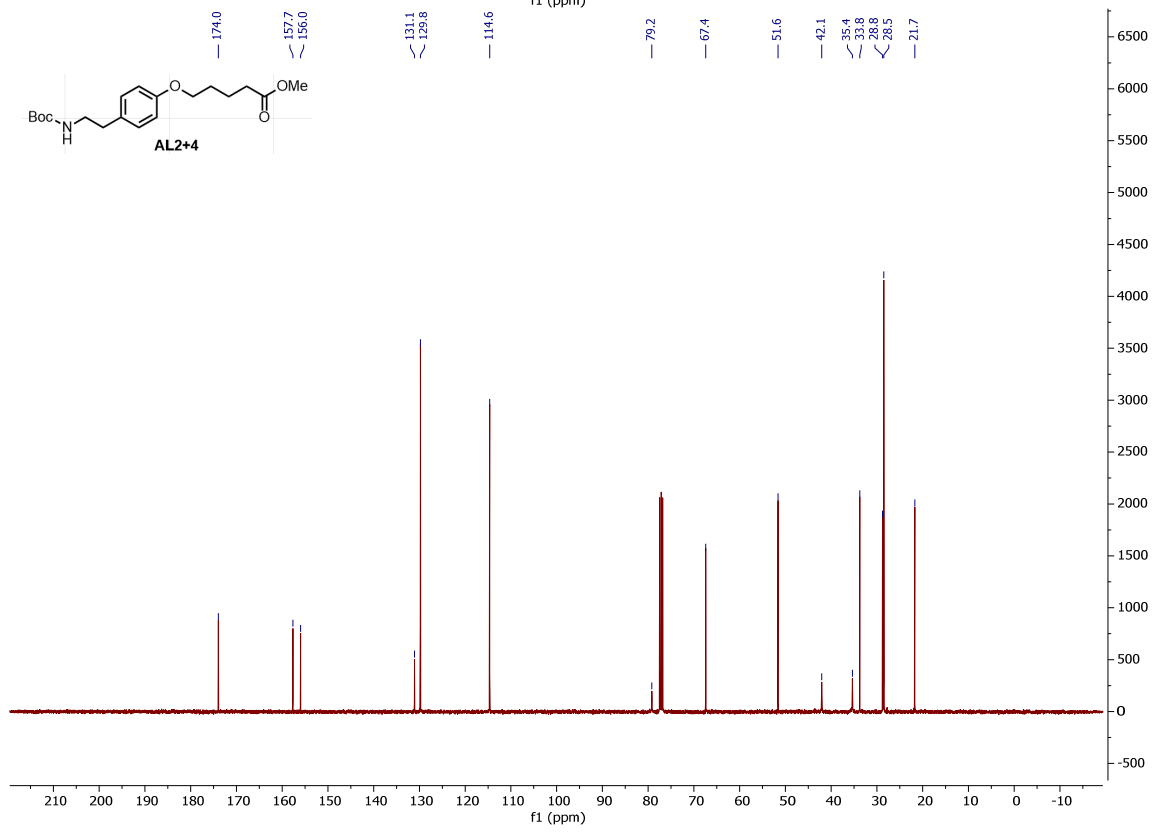

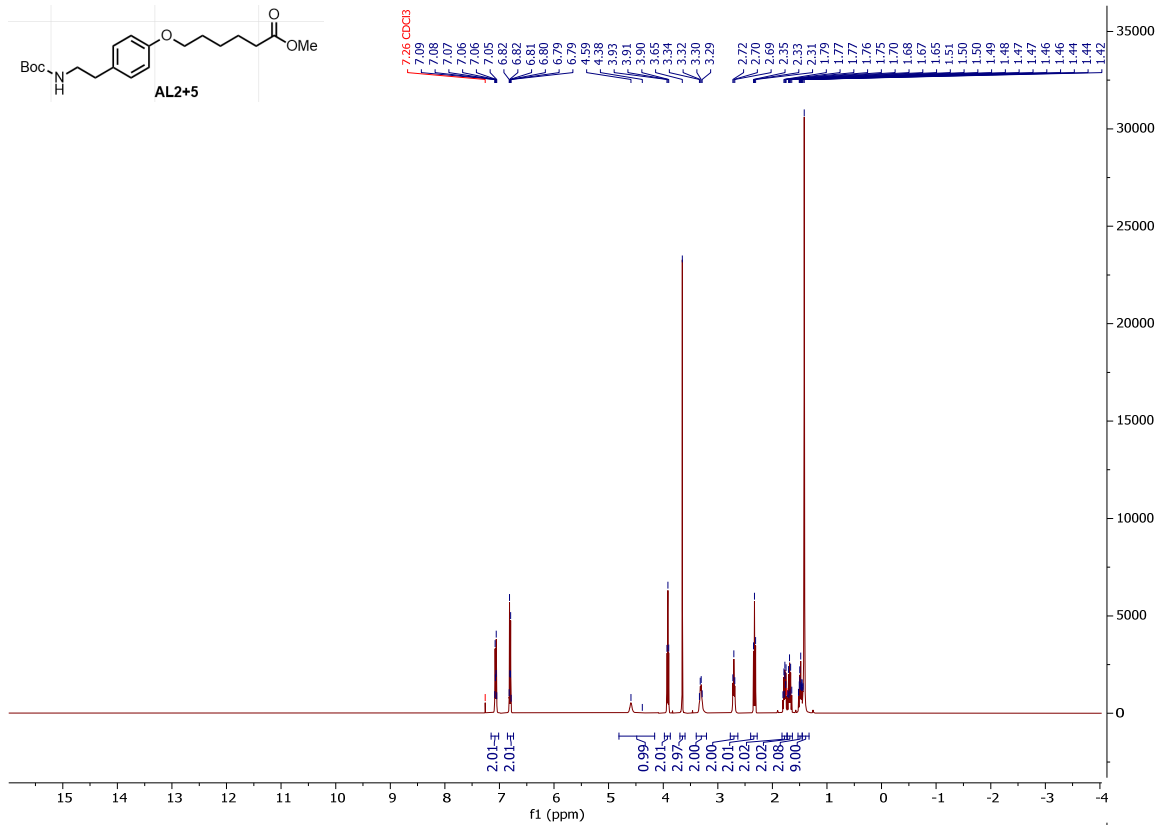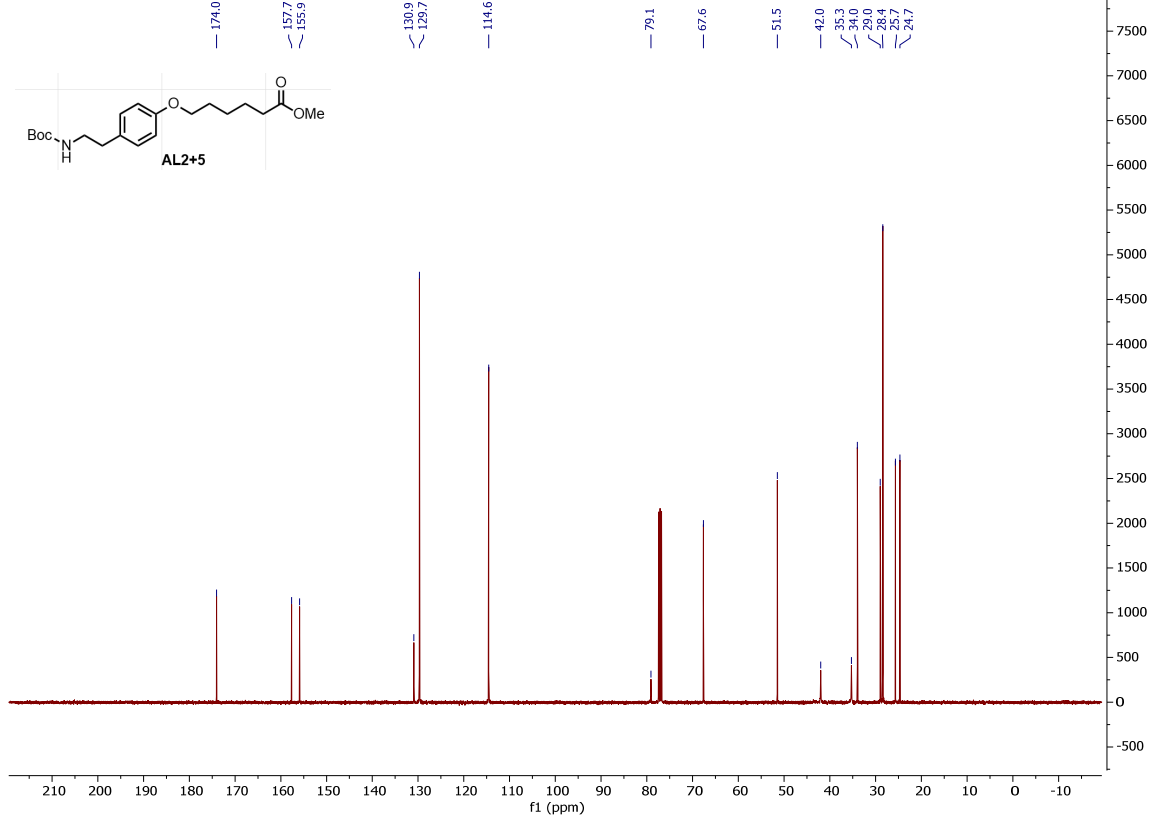

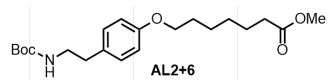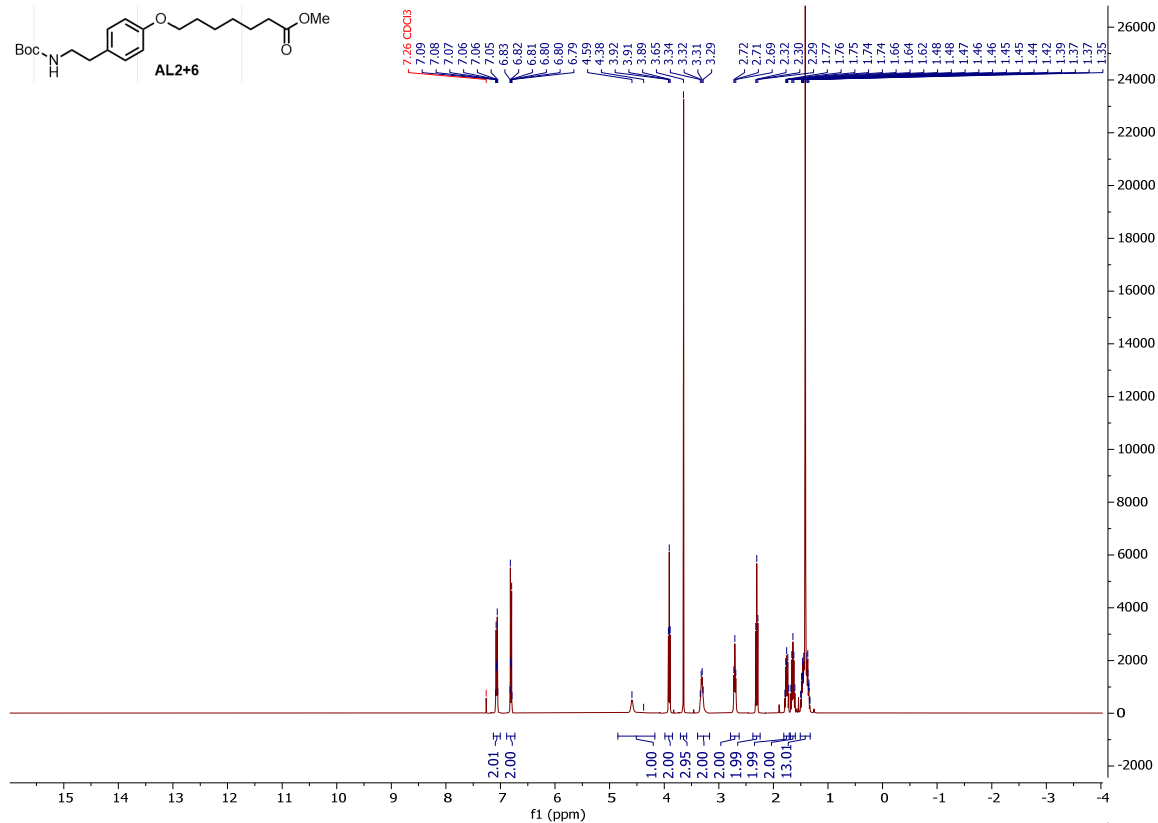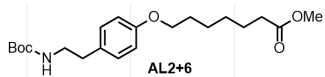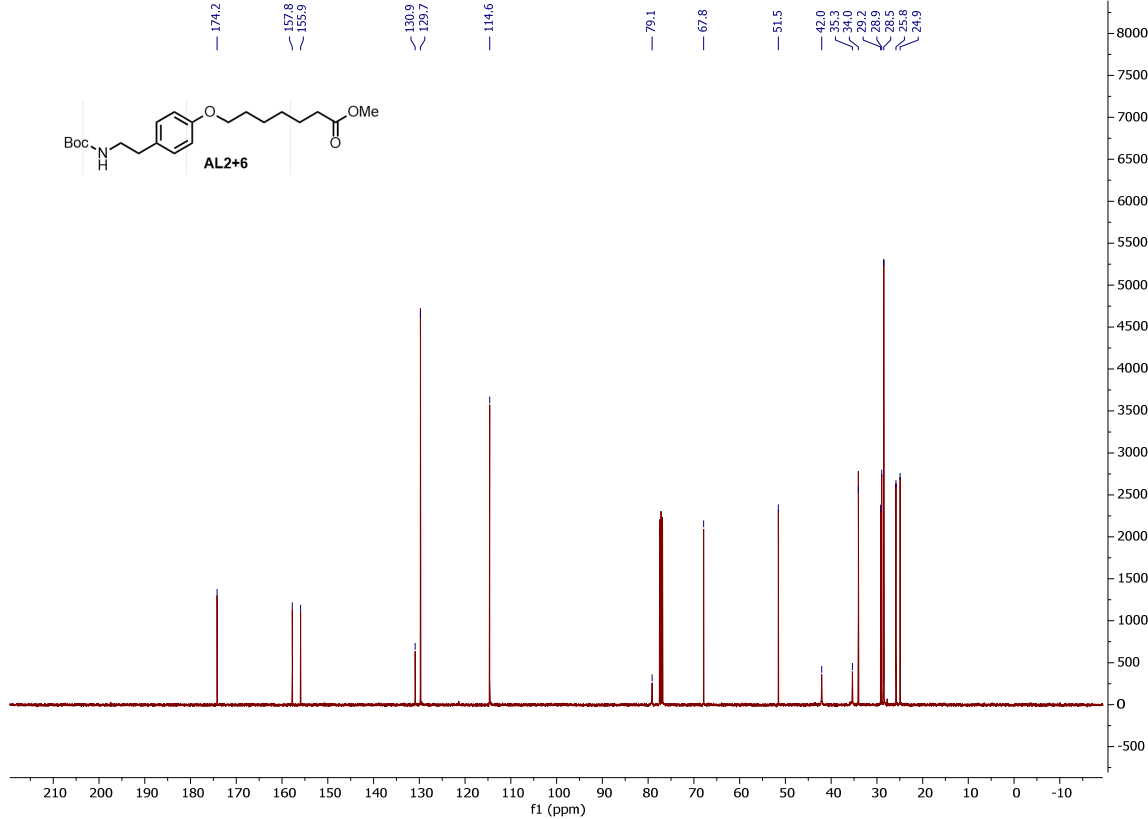

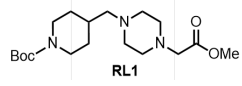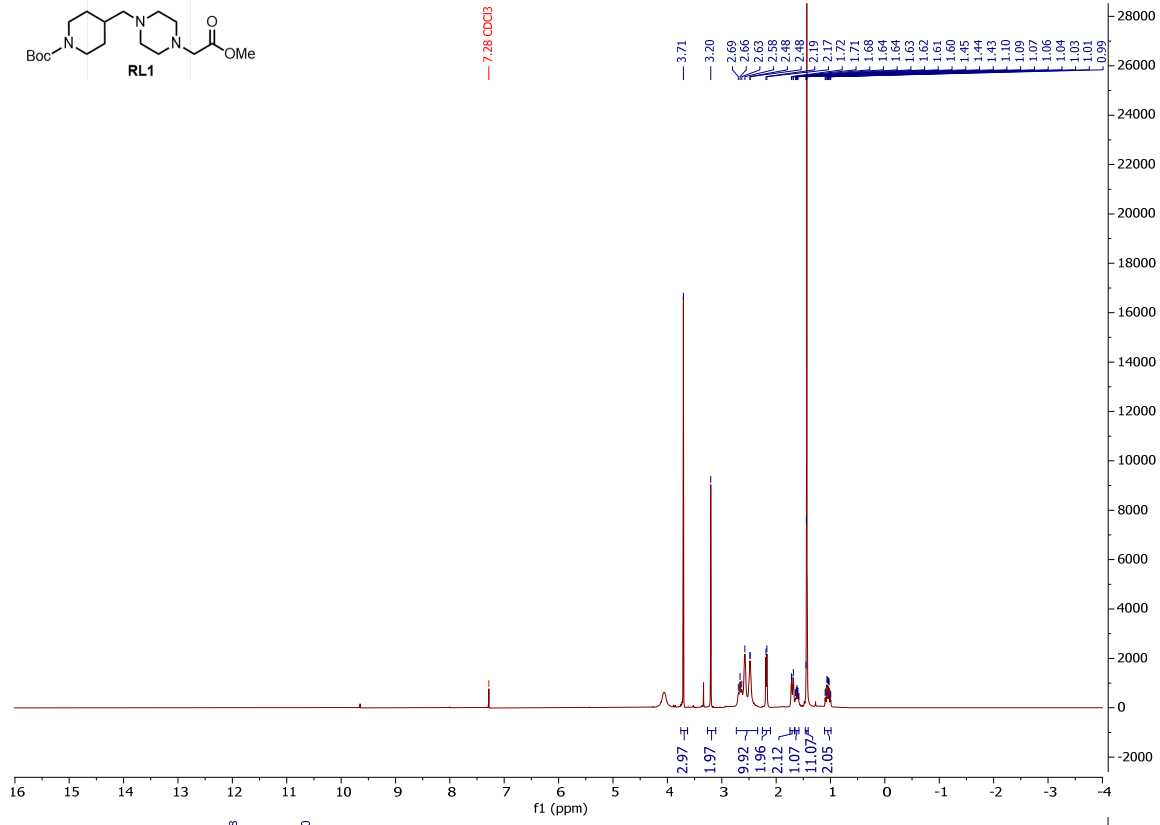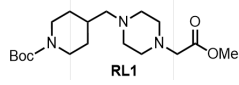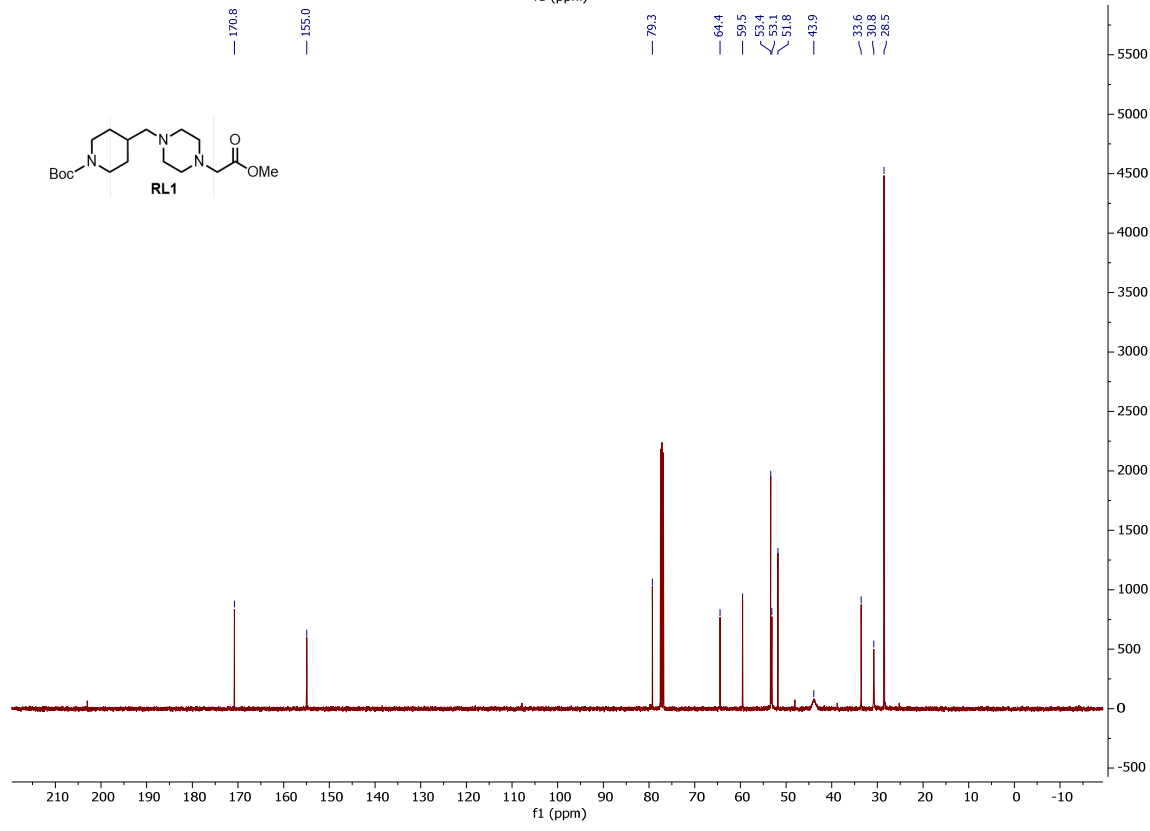

2023-05-23.1638-53.hoe.1.fid  
HX4222

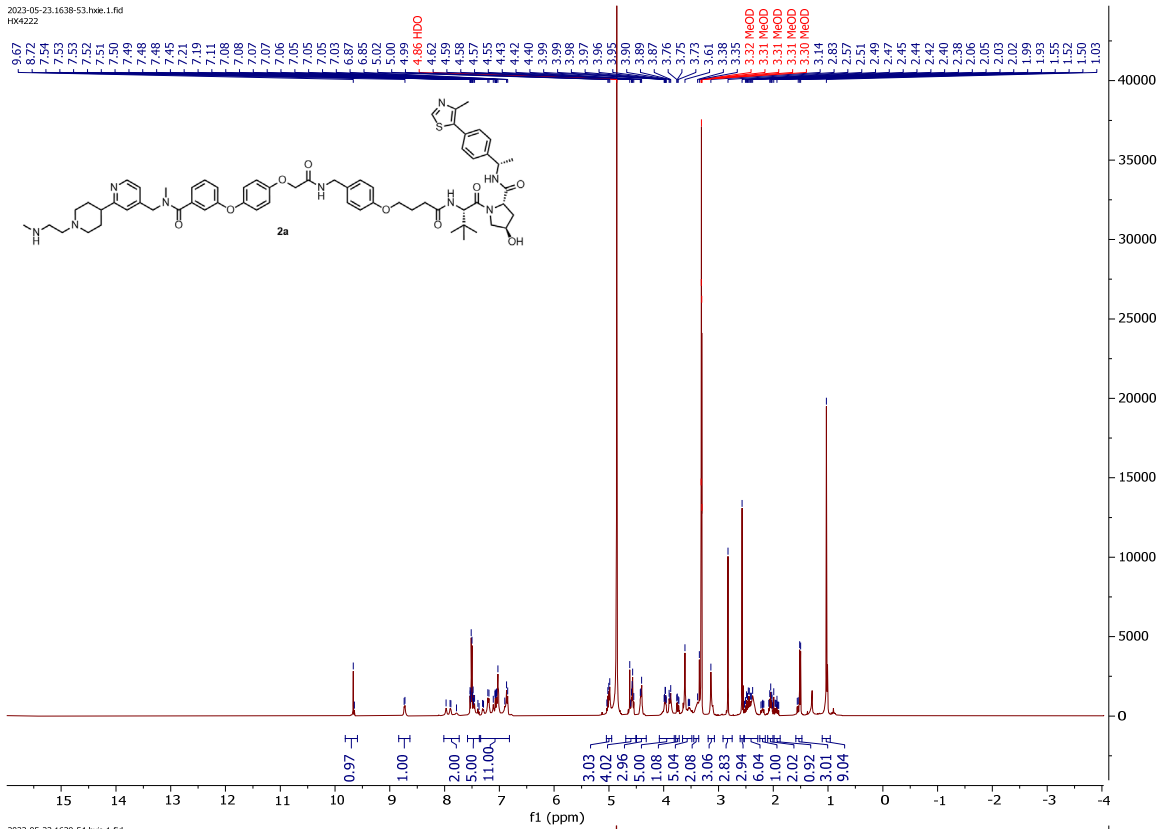

2023-05-23.1639-54.hoe.1.fid  
HX4223

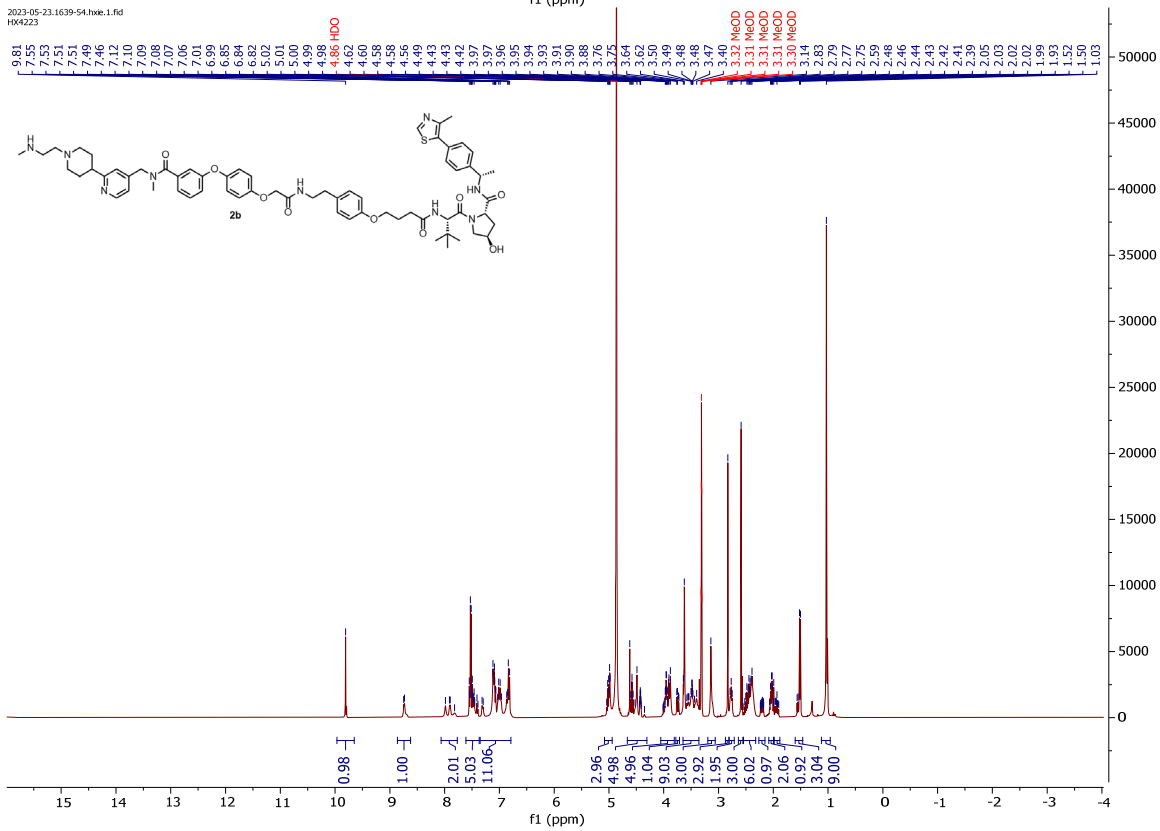

2023-05-23.1639-55.hoe.1.fid  
HX4224

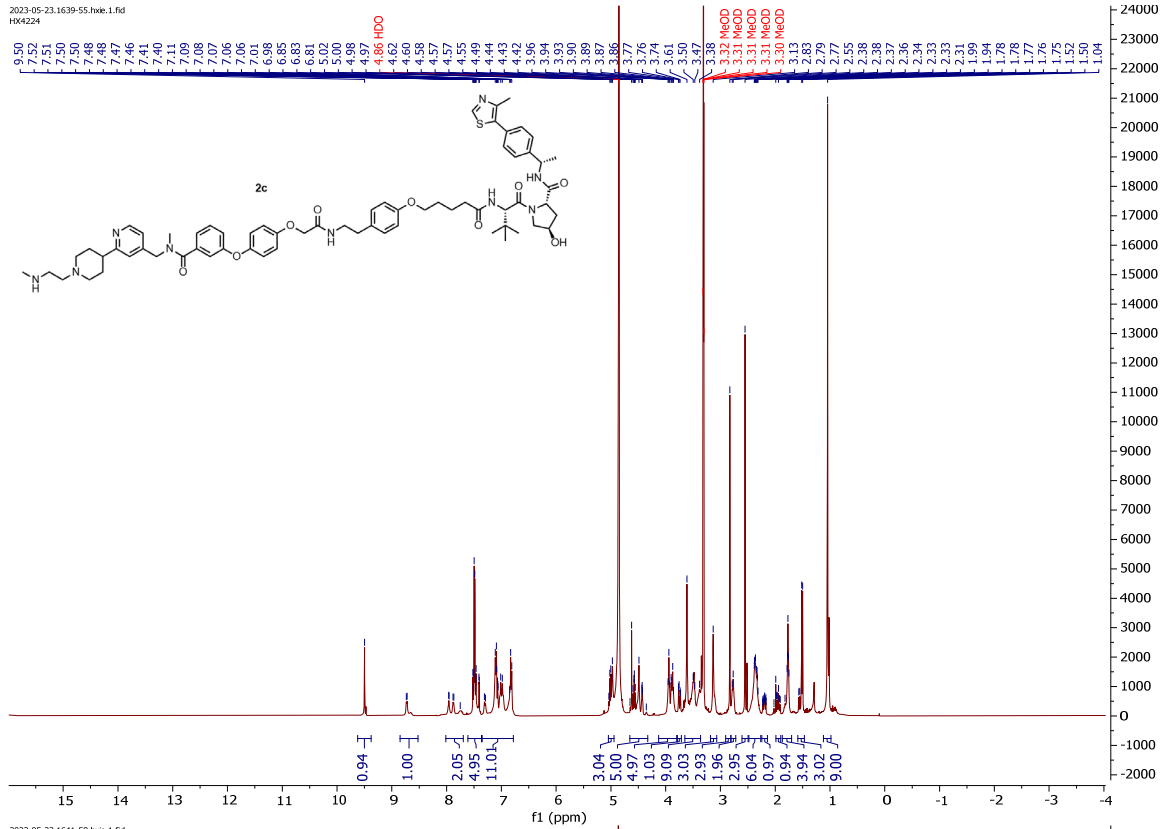

2023-05-23.1641-58.hoe.1.fid  
HX4255

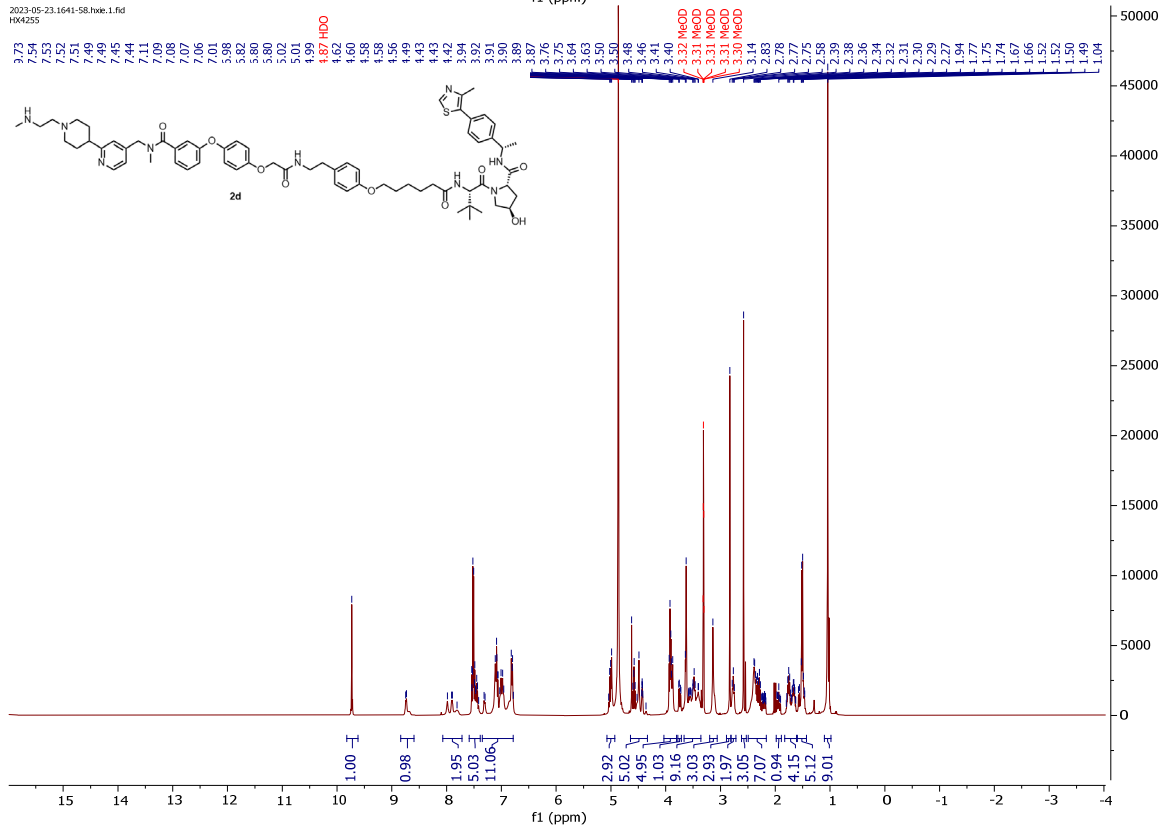

060823.pfc.2.fid  
 Hilbo Xie HK4255 08 June 2023 13C 129.626

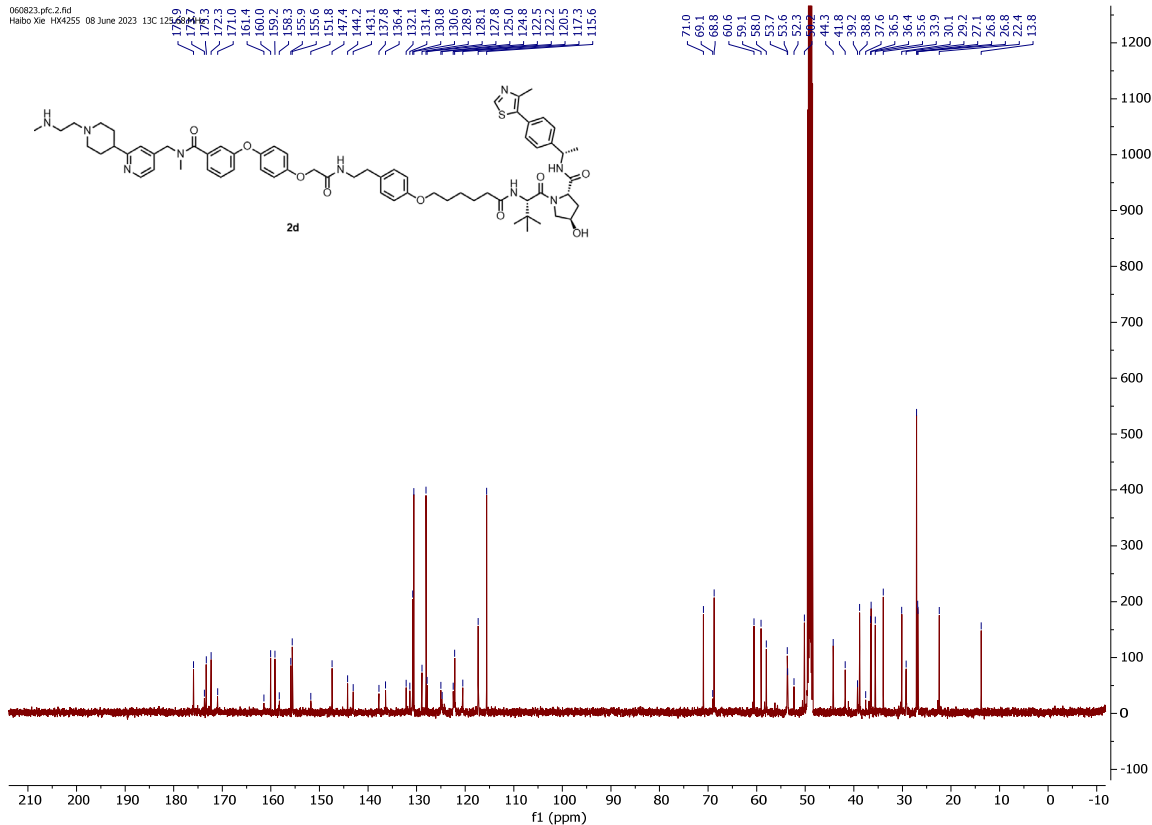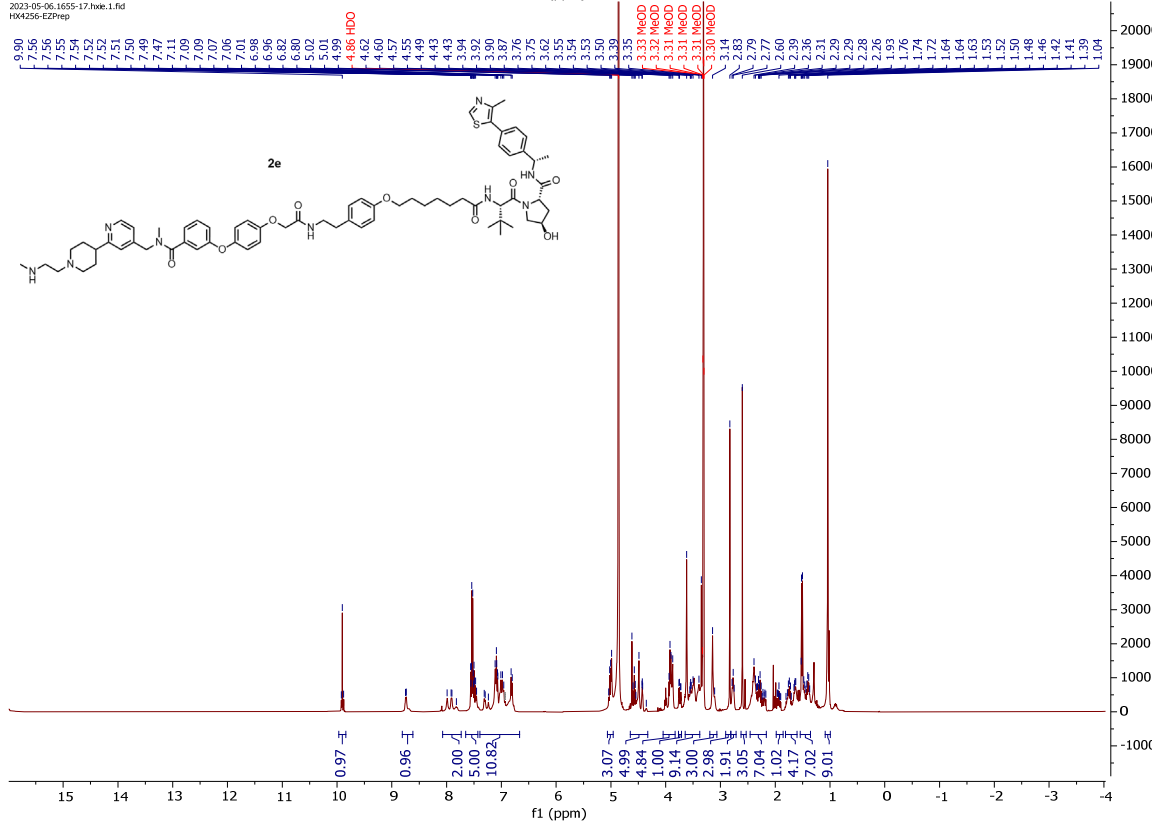







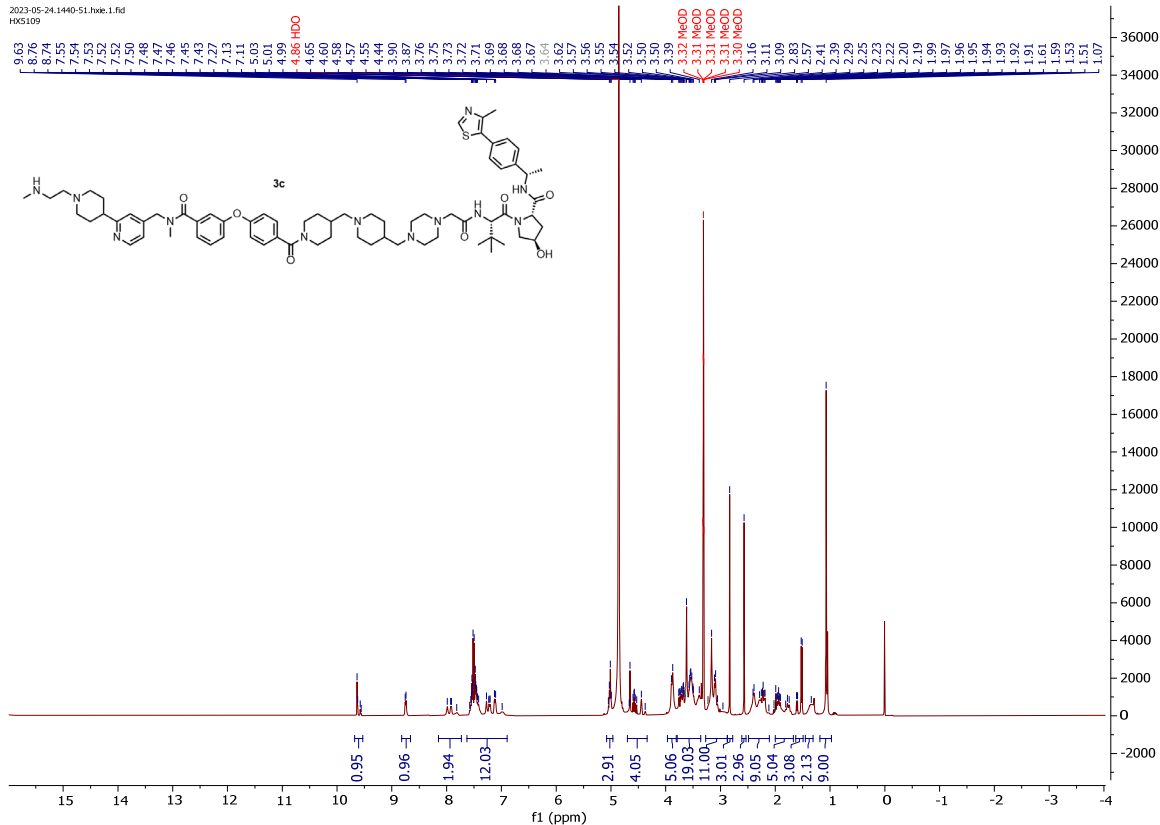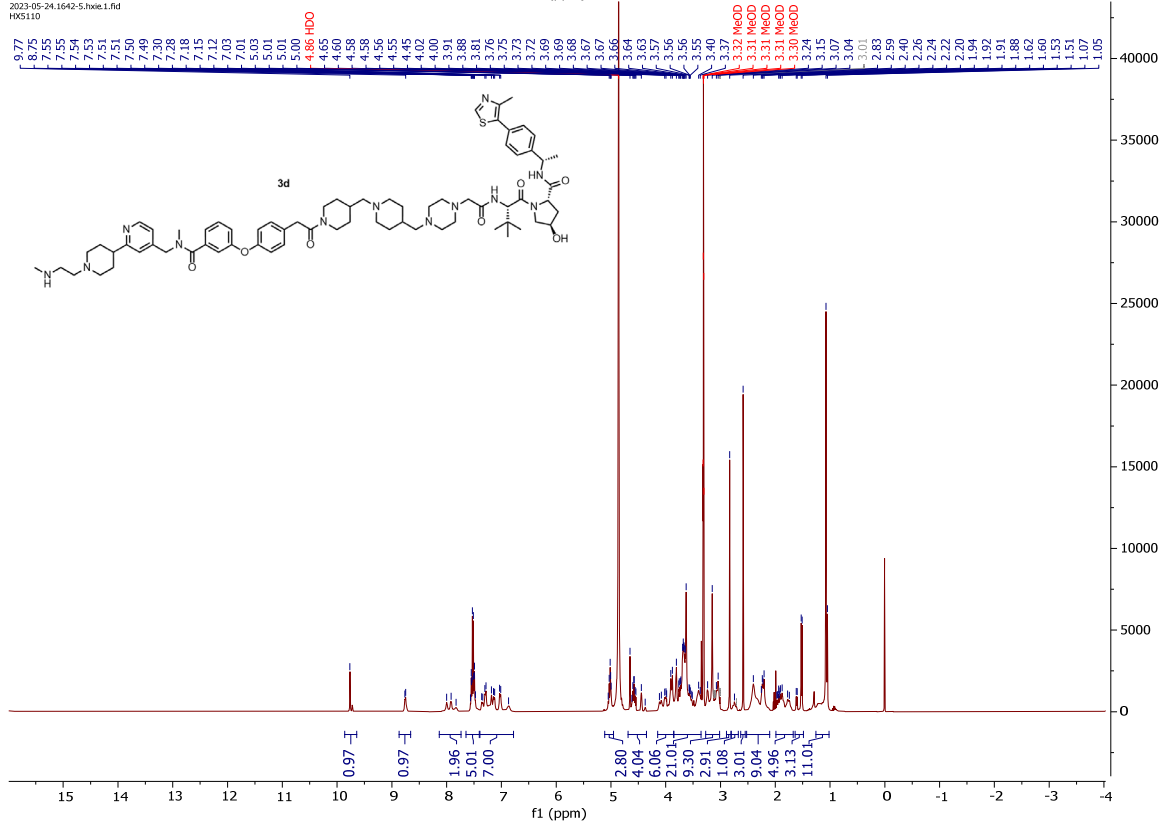

2023-05-24\_1643-4\_hx1e1.fid  
HX5111

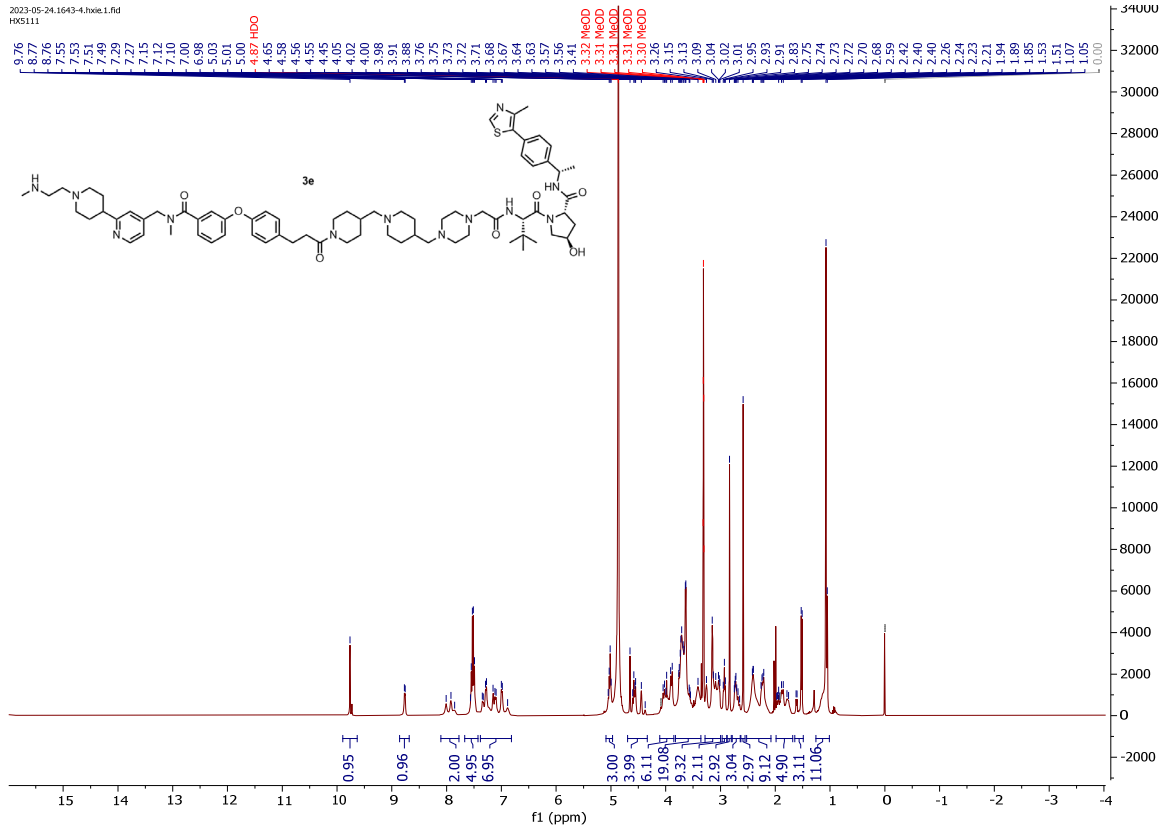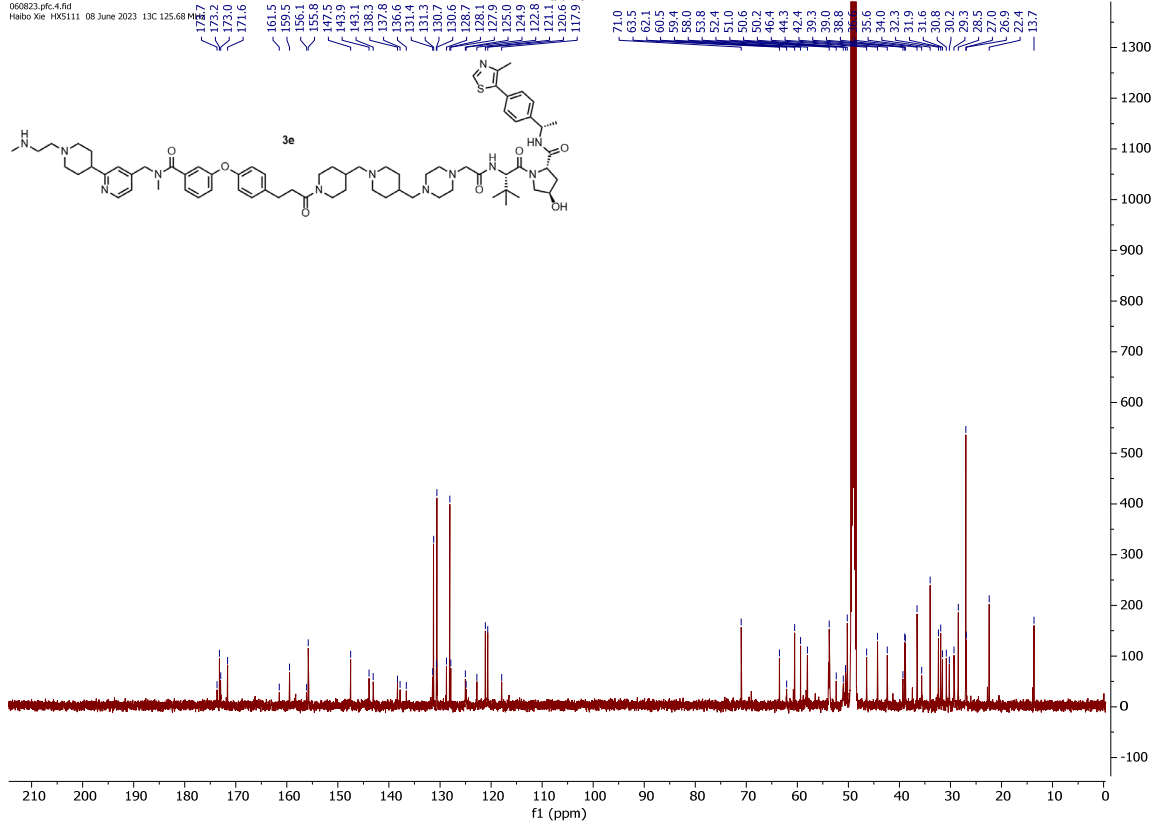

Supplement: NIHMS1956151-supplement-Supporting_Information.pdf [file NIHMS1956151-supplement-Supporting_Information.pdf]
